# Supplementary material for: The Burden of Late Effects and Related Risk Factors in Adolescent and Young Adult Cancer Survivors: A Scoping Review
Source: MDPI journal article supplement (doi:10.3390/cancers13194870), 2021-09-28
Supplement: s1 [file cancers-1365340-supplementary.pdf › cancers-1365340-supplementary.pdf]

# The burden of late effects and related risk factors in adolescent and young adult cancer survivors: A scoping review

## Supplementary Material

**Table S1.** Examples of keywords used in PubMed literature searches. Keywords were appropriately combined using Boolean operators and searches were limited to the year 2010 to current.

|                                                                                                                                                                                                                                                                                                                                                             |
|-------------------------------------------------------------------------------------------------------------------------------------------------------------------------------------------------------------------------------------------------------------------------------------------------------------------------------------------------------------|
| cancer, malign*, neoplasm, carcinoma, leukemia, leukaemia, lymphoma, sarcoma, melanoma                                                                                                                                                                                                                                                                      |
| adolescen*, young adult, adolescent and young adult, teen*, AYA                                                                                                                                                                                                                                                                                             |
| <i>Second malignant neoplasms</i><br>second neoplasm*, subsequent neoplasm*, second malignant neoplasm*, new primary cancer*, second cancer*                                                                                                                                                                                                                |
| <i>Chronic conditions and hospitalizations</i><br>hospitaliz*, hospitalis*, hospital admission*, chronic condition*, chronic disease*, chronic health condition*, chronic illness*<br>anxiety, depress*, mental health, psychosocial health, psychiatric<br>heart disease*, cardiovascular disease*, CVD, obesity, diabetes, metabolic syndrome<br>toxicity |
| <i>Mortality</i><br>death, mortality, surviv*                                                                                                                                                                                                                                                                                                               |

**Table S2.** Risk factors associated with second malignant neoplasms (SMNs) among adolescent and young adult cancer survivors by tumor group (n=23).

| Reference            | Country of origin         | Purpose                                                                                      | Data source                                                                       | Cancer type                                                                                                                                 | Diagnosis period | Age at diagnosis (years) | Survival entry date    | Number of AYA participants | Follow-up time      | Results                                                                                                                                                                                                                                                                                                                                                                                                                                                                                                                                          | Statistically significant risk factors                                          | Non-significant risk factors                   |
|----------------------|---------------------------|----------------------------------------------------------------------------------------------|-----------------------------------------------------------------------------------|---------------------------------------------------------------------------------------------------------------------------------------------|------------------|--------------------------|------------------------|----------------------------|---------------------|--------------------------------------------------------------------------------------------------------------------------------------------------------------------------------------------------------------------------------------------------------------------------------------------------------------------------------------------------------------------------------------------------------------------------------------------------------------------------------------------------------------------------------------------------|---------------------------------------------------------------------------------|------------------------------------------------|
| Mixed-cancer cohort  |                           |                                                                                              |                                                                                   |                                                                                                                                             |                  |                          |                        |                            |                     |                                                                                                                                                                                                                                                                                                                                                                                                                                                                                                                                                  |                                                                                 |                                                |
| Aben, 2012 [21]      | Netherlands               | To evaluate trends in cancer incidence, survival and risk of second primary cancers in AYAs. | The Netherlands Cancer Registry                                                   | Any primary malignancy except basal carcinomas of the skin                                                                                  | 1989-2009        | 15-29                    | At diagnosis           | 23,161                     | Median 6.8 years    | Males had a higher standardized incidence ratio than females (SIR=3.1, 95% CI 2.7-3.6 vs. SIR=2.0, 95% CI 1.8-2.3 respectively). The highest statistically significant SIR among males was for SMNs of the breast (SIR=16.7, 95%CI 1.9 – 60.2), but the number of observed cases were only 2, followed by SMN of bone and soft tissue (SIR=5.2, 95% CI 2.9-8.4) and the gastrointestinal tract (SIR=5.2, 95% CI 3.6-7.4). The highest statistically significant SIR among females was for SMN of the bone and tissue (SIR=6.3, 95% CI 3.5-10.3). | Male sex (SIR higher than for female sex)                                       | No                                             |
| Henderson, 2012 [22] | 27 North American Centres | To determine the risk of gastrointestinal SMN in childhood cancer survivors.                 | The Childhood Cancer Survivor Study                                               | First primary malignancy: leukemia, CNS malignancy, HL, NHL, neuroblastoma, soft-tissue sarcoma, kidney cancer or bone cancer. SMN: Sarcoma | 1970-1986        | 15-20                    | 5-years post-diagnosis | 2,487                      | Median 22.8 years   | No risk factors reported.                                                                                                                                                                                                                                                                                                                                                                                                                                                                                                                        | None presented                                                                  | NA                                             |
| Zhang, 2012 [18]     | Canada                    | To assess long-term risks of overall and cause-specific mortality and SMN among survivors of | Childhood, Adolescent and Young Adult Cancer Survivors (CAYACS); British Columbia | Any primary malignancy                                                                                                                      | 1970-1995        | 20-24                    | 5-years post-diagnosis | 1,248                      | 21,711 person-years | More cases of SMN than expected were observed among people who, especially, received RT (SIR 5.7, 95% CI 4.0-7.9; AER 4.5 per 1,000 person-years at risk) or CT (SIR 6.3, 95% CI 4.1-9.4; AER 3.9 per 1,000 person-years), or did not receive surgery (SIR                                                                                                                                                                                                                                                                                       | Radiation (SIR higher than for those who did not receive it), Chemotherapy (SIR | Certain primary cancers (Melanoma, Carcinomas) |

| Reference      | Country of origin | Purpose                                                                                                                                                  | Data source     | Cancer type                                                                                                                                                                                                                                  | Diagnosis period | Age at diagnosis (years) | Survival entry date    | Number of AYA participants | Follow-up time         | Results                                                                                                                                                                                                                                                                                                                               | Statistically significant risk factors                                                                                                                                                  | Non-significant risk factors |
|----------------|-------------------|----------------------------------------------------------------------------------------------------------------------------------------------------------|-----------------|----------------------------------------------------------------------------------------------------------------------------------------------------------------------------------------------------------------------------------------------|------------------|--------------------------|------------------------|----------------------------|------------------------|---------------------------------------------------------------------------------------------------------------------------------------------------------------------------------------------------------------------------------------------------------------------------------------------------------------------------------------|-----------------------------------------------------------------------------------------------------------------------------------------------------------------------------------------|------------------------------|
|                |                   | young adult cancer compared to the risk in the general British Columbia population and evaluate the effects of demographic and clinical factors on risk. | Cancer Registry |                                                                                                                                                                                                                                              |                  |                          |                        |                            |                        | 5.0, 95% CI 3.0-7.8; AER 3.5 per 1,000 person-years).                                                                                                                                                                                                                                                                                 | higher than for those who did not receive it), No surgery (SIR higher than for those who did not receive it), 5-19 years follow-up time (SIR higher than for those followed 20+ years), |                              |
| Lee, 2016 [17] | United States     | To describe the incidence and characteristic s of SMN in AYA cancer survivors compared to those in younger and older cancer survivors.                   | SEER            | First Primary: leukemia, lymphoma, germ cell tumors (Testicular, Ovarian) , melanoma, thyroid, breast, sarcomas (soft tissue or bone). SMNs: Any cancer with malignant behaviour excluding basal cell and cutaneous squamous cell carcinomas | 1973-2011        | 15-39                    | 5-years post-diagnosis | 148,558                    | 2,526,854 person-years | The 30-year cumulative incidence of SMN was higher among those who received radiation therapy compared to those who did not (17.6%, (95% CI:16.9%-18.3%) vs. 12.4%, (95% CI:12%-12.7%). The highest AER was observed in patients who were diagnosed with primary breast cancer (SIR 2.1, AER 54.4) or primary HL (SIR 2.8, AER 48.6). | Type of primary cancer, Radiation therapy (vs. no RT)                                                                                                                                   | No                           |

| Reference         | Country of origin | Purpose                                                                                                                                                                    | Data source                                                                               | Cancer type                                                          | Diagnosis period | Age at diagnosis (years) | Survival entry date    | Number of AYA participants | Follow-up time            | Results                                                                                                                                                                            | Statistically significant risk factors            | Non-significant risk factors |
|-------------------|-------------------|----------------------------------------------------------------------------------------------------------------------------------------------------------------------------|-------------------------------------------------------------------------------------------|----------------------------------------------------------------------|------------------|--------------------------|------------------------|----------------------------|---------------------------|------------------------------------------------------------------------------------------------------------------------------------------------------------------------------------|---------------------------------------------------|------------------------------|
| Teepen, 2017 [19] | Netherlands       | To evaluate the long-term risk of SMN in a cohort of 5-year childhood cancer survivors with a focus on chemotherapy agents and risk of solid tumors.                       | The Dutch Childhood Cancer Oncology Group-Long-Term Effects After Childhood Cancer cohort | Any primary malignancy                                               | 1963-2001        | 15-17                    | 5-years post-diagnosis | 401                        | Median 20.7 years         | No risk factors reported.                                                                                                                                                          | None presented                                    | NA                           |
| Hayek, 2018 [23]  | Israel            | To estimate the risk of second primary neoplasm and long-term mortality among 5+ year childhood cancer survivors relative to their counterparts in the general population. | Israel National Cancer Registry                                                           | Any primary malignancy                                               | 1980-2007        | 15-19                    | 5-years post-diagnosis | 1,765                      | Age-specific follow-up NR | No risk factors reported.                                                                                                                                                          | None presented                                    | NA                           |
| Bright, 2019 [24] | England           | To investigate the risk of specific subsequent                                                                                                                             | Teenage and Young Adult Cancer Survivor Study                                             | Breast, cervical, testicular, HL, NHL, melanoma, CNS (intracranial), | 1971-2006        | 15-39                    | 5-years post-diagnosis | 197,827                    | Median 16.8 years         | For women, statistically significant SIRs for the development of any subsequent primary neoplasm after specific cancers ranged from 1.3 (95% CI 1.1-1.6) for head and neck and 1.3 | Younger age at diagnosis, Type of primary cancer, | No                           |

| Reference       | Country of origin | Purpose                                                                                                                                                                                       | Data source                                                      | Cancer type                                                                                                           | Diagnosis period | Age at diagnosis (years) | Survival entry date    | Number of AYA participants | Follow-up time   | Results                                                                                                                                                                                                                                                                                                                                                                                                                                                                                                                           | Statistically significant risk factors                                                                                                                                                                                               | Non-significant risk factors                                                                                                                                                                                                                               |
|-----------------|-------------------|-----------------------------------------------------------------------------------------------------------------------------------------------------------------------------------------------|------------------------------------------------------------------|-----------------------------------------------------------------------------------------------------------------------|------------------|--------------------------|------------------------|----------------------------|------------------|-----------------------------------------------------------------------------------------------------------------------------------------------------------------------------------------------------------------------------------------------------------------------------------------------------------------------------------------------------------------------------------------------------------------------------------------------------------------------------------------------------------------------------------|--------------------------------------------------------------------------------------------------------------------------------------------------------------------------------------------------------------------------------------|------------------------------------------------------------------------------------------------------------------------------------------------------------------------------------------------------------------------------------------------------------|
|                 |                   | primary neoplasms after each of 16 types of AYA cancer.                                                                                                                                       | (Teenage and Young Adult Cancer Survivor Study ), United Kingdom | colorectal, thyroid, soft-tissue sarcoma, ovarian, bladder, other female genital cancers, leukemia, and head and neck |                  |                          |                        |                            |                  | (95% CI 1.2-1.5) for CNS to 3.1 (95% CI 2.9-3.3) for HL. For men, significant SIRs ranged from 1.2 (95% CI for 1.1-1.4) for bladder to 2.6 (95% CI 2.4-2.8) for HL and 2.6 (95% CI 2.1-3.1) for leukemia. Excess risk of developing a subsequent primary neoplasm increased with follow-up time from diagnosis. For the development of any SMN after a specific first primary cancer diagnosis, SIRs ranged from 1.1 (95% CI 1.1-1.2) for breast cancer to 2.0 (95% CI 1.9-2.0) for lung cancer to 3.0 (95% CI 2.6-3.5) meninges. | Earlier decade of diagnosis, Time from diagnosis                                                                                                                                                                                     |                                                                                                                                                                                                                                                            |
| Chao, 2019 [25] | United States     | To provide a comprehensive assessment of SMN risk in survivors of AYA cancer using study methods that minimized confounding to inform survivorship care planning for survivors of AYA cancer. | SEER                                                             | Any primary malignancy                                                                                                | 1990-2012        | 15-39                    | 2-years post-diagnosis | 10,574                     | Median 7.7 years | Older age at diagnosis (30-39, IRR 1.79, 95% CI 1.21-2.65), female sex (IRR 1.31 95% CI 1.09-1.57), advanced stage at diagnosis (Stage II, IRR 1.35, 95% CI 1.11-1.65) , and exposure to RT (IRR 1.50, 95% CI 1.26-1.79) were associated with greater risk of developing any SMN. Asian ethnicity (compared to non-Hispanic White, IRR 0.61, 95% CI 0.43-0.87) and later calendar period of diagnosis (2003-2014 compared to 1990-2002, IRR 0.80, 95% CI 0.67-0.96) were associated with a lesser risk of developing any SMN.     | Older age at diagnosis (30-39 vs. 15-19), female sex (vs. male), advanced stage at diagnosis (TMN stage II or III/IV vs. TMN stage I), radiation therapy (vs. no radiation therapy), Non-Hispanic White (vs. Asian/Pacific Islander) | Calendar period of diagnosis (2003-2014 vs. 1990-2002), Non-Hispanic Black, Hispanic (vs. Non-Hispanic White), Radiation (yes vs. no), Alkylating agents (yes vs. no), Anthracyclines (yes vs. no), Epipodphyllotoxin (yes vs. no), Platinums (yes vs. no) |

| Reference          | Country of origin      | Purpose                                                                                                                                | Data source                                                                                                   | Cancer type                                                                                                                                                                        | Diagnosis period              | Age at diagnosis (years) | Survival entry date    | Number of AYA participants | Follow-up time       | Results                   | Statistically significant risk factors | Non-significant risk factors |
|--------------------|------------------------|----------------------------------------------------------------------------------------------------------------------------------------|---------------------------------------------------------------------------------------------------------------|------------------------------------------------------------------------------------------------------------------------------------------------------------------------------------|-------------------------------|--------------------------|------------------------|----------------------------|----------------------|---------------------------|----------------------------------------|------------------------------|
| Fidler, 2018 [26]  | 12 European countries* | To investigate the risk of subsequent primary bone cancers after childhood and adolescent cancer in 12 European countries.             | PanCareSurF up                                                                                                | First primary malignancy: All cancers. SMN: bone cancers.                                                                                                                          | Varied by country             | 15-19                    | 5-years post-diagnosis | 11,472                     | Median 21.4 years    | No risk factors reported. | None presented                         | NA                           |
| Zakaria, 2019 [20] | Canada                 | To quantify the risk and correlates of second cancer in Canadians diagnosed with a first cancer prior to age 20.                       | Death-linked Canadian Cancer Registry                                                                         | Any primary malignancy except epithelial, basal and squamous skin cancer                                                                                                           | 1992-2014                     | 15-19                    | 61 days post-diagnosis | 7,460                      | 204,309 person-years | No risk factors reported. | None presented                         | NA                           |
| Reulen, 2020 [27]  | 12 European countries* | To estimate risk of specific digestive second primary neoplasms among 5-year cancer survivors of childhood cancer beyond age 40 years. | PanCareSurF up and linkage with population based national registries, other sources of national clinical data | Any primary malignancy except myelodysplastic syndrome, Langerhans cell histiocytosis, chronic myeloproliferative or lymphoproliferative disorder or a immunoproliferative disease | 1940-2008 - Varies by country | 15-19                    | 5-years post-diagnosis | 21,402                     | Median 16.3 years    | No risk factors reported. | None presented                         | NA                           |

| Reference               | Country of origin | Purpose                                                                                              | Data source                                                                            | Cancer type                           | Diagnosis period               | Age at diagnosis (years) | Survival entry date    | Number of AYA participants | Follow-up time                                                                                        | Results                                                                                                                                                                                                                                                                                                                                                                                                                                                                                              | Statistically significant risk factors                                                       | Non-significant risk factors |
|-------------------------|-------------------|------------------------------------------------------------------------------------------------------|----------------------------------------------------------------------------------------|---------------------------------------|--------------------------------|--------------------------|------------------------|----------------------------|-------------------------------------------------------------------------------------------------------|------------------------------------------------------------------------------------------------------------------------------------------------------------------------------------------------------------------------------------------------------------------------------------------------------------------------------------------------------------------------------------------------------------------------------------------------------------------------------------------------------|----------------------------------------------------------------------------------------------|------------------------------|
| Hodgkin lymphoma cohort |                   |                                                                                                      |                                                                                        |                                       |                                |                          |                        |                            |                                                                                                       |                                                                                                                                                                                                                                                                                                                                                                                                                                                                                                      |                                                                                              |                              |
| Swerdlow, 2011 [28]     | United Kingdom    | To evaluate the risk of SMN in a large British cohort of HL patients treated with chemotherapy.      | British National Lymphoma Investigation                                                | HL                                    | 1963-2006 (varied by hospital) | 25-34                    | At diagnosis           | 2,291                      | 7,318 person-years (chemo only group) and 12,123 person-years (chemo therapy plus radiotherapy group) | AYA cancer survivors (age 25-34) who underwent chemotherapy plus radiotherapy experienced a greater risk of second primary malignancies than survivors who underwent chemotherapy only (SIR 4.2, 95% CI 3.3-5.4 and AER 44.9 vs. SIR 2.9, 95% CI 1.9-4.4 and AER 21.6). This trend was true for the development of solid tumors, and NHL, but not for leukemia. For both treatments, the number of observed cases of SMN were significantly higher than what was expected in the general population. | Radiation in addition to chemotherapy (SIR higher than for chemotherapy alone)               | No                           |
| Swerdlow, 2012 [29]     | England and Wales | To examine breast cancer risks in relation to supradiaphragmatic radiotherapy in Britain.            | Case notes, cancer registries, reports from clinicians, screening clinics, and patient | First Primary: HL. SPN: Breast Cancer | 1956-2003                      | 15-36                    | At diagnosis           | 4,767                      | 84,725 person-years                                                                                   | SIR and AERs per 10,000 person-years were elevated in all five-year age groups, but were highest in the 15-19 age group (SIR 14.3, 95% CI 12.0-17.4; AER 58.6, 95% CI 47.7-71.1) and lowest in the 30-35 age group (SIR 2.4, 95% CI 1.8-3.0; AER 19.4, 95% CI 11.4-29.2).                                                                                                                                                                                                                            | Fewer years since diagnosis/treatment, younger age at first supradiaphragmatic RT (vs. older | No                           |
| Schaapveld, 2015 [30]   | Netherlands       | To investigate the long-term risk of a second cancer and changes in risk over time in a large cohort | Netherlands Cancer Registry                                                            | HL                                    | 1965-2000                      | 15-34                    | 5-years post-diagnosis | 2,736                      | Median 19.1 years                                                                                     | For individuals who were aged 15-24 at the time of treatment for first HL, the SIR for experiencing any type of SMN was 8.4 (95% CI 7.5-9.5), with an associated AER of 111 per 10,000 person-years, compared to the general population. For individuals who were aged 25-34 at the time of treatment for first HL, the SIR for experiencing SMN was 5.0 (95% CI                                                                                                                                     | Younger age at first treatment                                                               | No                           |

| Reference          | Country of origin | Purpose                                                                                  | Data source                                                                                                                                                      | Cancer type                         | Diagnosis period | Age at diagnosis (years) | Survival entry date     | Number of AYA participants | Follow-up time                      | Results                                                                                                                                                                                                                                                                                                                                                                                                                                                                                                    | Statistically significant risk factors                                                                | Non-significant risk factors |
|--------------------|-------------------|------------------------------------------------------------------------------------------|------------------------------------------------------------------------------------------------------------------------------------------------------------------|-------------------------------------|------------------|--------------------------|-------------------------|----------------------------|-------------------------------------|------------------------------------------------------------------------------------------------------------------------------------------------------------------------------------------------------------------------------------------------------------------------------------------------------------------------------------------------------------------------------------------------------------------------------------------------------------------------------------------------------------|-------------------------------------------------------------------------------------------------------|------------------------------|
|                    |                   | of HL survivors in the Netherlands.                                                      |                                                                                                                                                                  |                                     |                  |                          |                         |                            |                                     | 4.4-5.6), with an associated AER of 118 per 10,000 person-years.                                                                                                                                                                                                                                                                                                                                                                                                                                           |                                                                                                       |                              |
| Xavier, 2015 [31]  | United States     | To analyze SMN and survival outcomes of AYAs with early stage classical HL.              | SEER                                                                                                                                                             | HL                                  | 1995-2010        | 15-39                    | 6-months post-diagnosis | 5,156                      | Median 97 months                    | At 150 months, the cumulative risk of SMN was 3.3% and 3.0% for people who had and had not received radiation therapy, respectively. The difference was not statistically significant (p=0.87). Among people treated with radiation therapy, carcinomas (59.5%), myelogenous leukemia/myelodysplastic syndrome (12.2%) and NHL (12.2%) were the most commonly developed SMNs. Among people not treated with RT, carcinomas (50%), NHL (17.3%) and melanomas (11.5%) were the most commonly developed SMNs. | None                                                                                                  | Radiation therapy            |
| Bhuller, 2016 [32] | Canada            | To highlight specific long-term morbidity and mortality issues for TYA patients with HL. | Childhood, Adolescent and Young Adult Cancer Survivors (CAYACS) Research Program in British Columbia; cases identified from the British Columbia Cancer Registry | First Primary: HL. SPN: All cancers | 1970-1999        | 15-24                    | 5-years post-diagnosis  | 442                        | Median 19.6 years from diagnosis is | All treatment modalities were associated with SMN. RT (HR=2.7, 95% CI 1.0-7.7) and female sex (HR=1.8, 95% CI 1.0-1.3) were associated with SMN in multivariate models. SIRs for SMN were statistically significant for individuals diagnosed between 1970-1979 and 1980-1989, but not 1990-1999.                                                                                                                                                                                                          | Female sex (vs. male), Radiation therapy (vs. no RT), Earlier decades of diagnosis (SIRs significant) | No                           |



| Reference                    | Country of origin | Purpose                                                                                                                                           | Data source                                                                                                                     | Cancer type                                          | Diagnosis period | Age at diagnosis (years) | Survival entry date     | Number of AYA participants | Follow-up time    | Results                                                                                                                                                                                                                                                                                                                                                                                                                                                                                                                                                                                 | Statistically significant risk factors                                                   | Non-significant risk factors |
|------------------------------|-------------------|---------------------------------------------------------------------------------------------------------------------------------------------------|---------------------------------------------------------------------------------------------------------------------------------|------------------------------------------------------|------------------|--------------------------|-------------------------|----------------------------|-------------------|-----------------------------------------------------------------------------------------------------------------------------------------------------------------------------------------------------------------------------------------------------------------------------------------------------------------------------------------------------------------------------------------------------------------------------------------------------------------------------------------------------------------------------------------------------------------------------------------|------------------------------------------------------------------------------------------|------------------------------|
| van Eggermond, 2017 [33]     | Netherlands       | To assess long-term, site-specific risk of colorectal SMN associated with specific radiation fields and chemotherapy regimens in survivors of HL. | Dutch University Hospitals or Cancer Centres plus affiliated hospitals of the former population-based Eindhoven Cancer Registry | First primary malignancy: HL. SMN: colorectal cancer | 1965-1995        | 25-34                    | 5-years post-diagnosis  | 1,009                      | Median 22.9 years | No risk factors reported.                                                                                                                                                                                                                                                                                                                                                                                                                                                                                                                                                               | None presented                                                                           | NA                           |
| Other tumor-specific cohorts |                   |                                                                                                                                                   |                                                                                                                                 |                                                      |                  |                          |                         |                            |                   |                                                                                                                                                                                                                                                                                                                                                                                                                                                                                                                                                                                         |                                                                                          |                              |
| Goldfarb, 2014 [34]          | United States     | To compare the tumor characteristics, treatment, and overall survival of SMN versus primary thyroid cancer in AYA patients.                       | National Cancer Database                                                                                                        | Thyroid cancer                                       | 2004-2010        | 15-39                    | At diagnosis            | 41,062                     | Mean 35.5 months  | Compared with cases of primary thyroid cancer, SMNs were more likely to occur in people who were White (OR=2.6, 95% CI 1.3-5.3), aged 35 to 39 years (OR=1.2, 95% CI 1.1-1.4), and whose tumors had tall/columnar cell histology (OR 2.19, 95% CI 1.5-3.2), were <1 cm (OR 1.50, 95% CI 1.3-1.7) or with multifocality (OR 1.17, 95% CI 1.05-1.3). Secondary thyroid cancers occurred less in females (OR=0.61, 95% CI 0.5-0.7), Hispanics (OR=0.78, 0.6-0.9), people aged 15 to 19 (OR=0.62, 95% CI 0.5-0.8) or 25 to 29 years (OR=0.71, 95% CI 0.6-0.8) at the time of SMN diagnosis. | White (vs. Hispanic), Older at diagnosis (35-39) (vs. 15-19 or 24-29), Male (vs. female) | None                         |
| Lee, 2014 [35]               | United States     | To describe the incidence, characteristics, and outcomes of                                                                                       | SEER                                                                                                                            | First Primary: osteosarcoma. SMN: all                | 1973-2010        | 21-39                    | 6-months post-diagnosis | 609                        | Median 4.2 years  | No risk factors reported.                                                                                                                                                                                                                                                                                                                                                                                                                                                                                                                                                               | None presented                                                                           | NA                           |

| Reference          | Country of origin | Purpose                                                                                                                                                                       | Data source                | Cancer type                                                                        | Diagnosis period | Age at diagnosis (years) | Survival entry date    | Number of AYA participants                | Follow-up time                                                             | Results                                                                                                      | Statistically significant risk factors     | Non-significant risk factors                                                                                                                                                                                                                                     |
|--------------------|-------------------|-------------------------------------------------------------------------------------------------------------------------------------------------------------------------------|----------------------------|------------------------------------------------------------------------------------|------------------|--------------------------|------------------------|-------------------------------------------|----------------------------------------------------------------------------|--------------------------------------------------------------------------------------------------------------|--------------------------------------------|------------------------------------------------------------------------------------------------------------------------------------------------------------------------------------------------------------------------------------------------------------------|
|                    |                   | SMNs in long-term survivors of osteosarcoma .                                                                                                                                 |                            | cancers except osteosarcoma                                                        |                  |                          |                        |                                           |                                                                            |                                                                                                              |                                            |                                                                                                                                                                                                                                                                  |
| Sultan, 2019 [36]  | United States     | To estimate the incidence and type of second malignancies occurring in patients diagnosed with Ewing sarcoma family of tumors over a 33-year period.                          | SEER                       | First primary malignancy: Ewing sarcoma. SMN: All cancers excluding in situ tumors | 1973-2005        | 20-39                    | At diagnosis           | 324                                       | Mean 6.7 years                                                             | No risk factors reported.                                                                                    | None presented                             | NA                                                                                                                                                                                                                                                               |
| Abrahao, 2020 [37] | United States     | To estimate the cumulative incidence of late effects at 10 years among HIV-uninfected and HIV-infected AYAs diagnosed with NHL during 1996-2012, who survived $\geq 2$ years. | California Cancer Registry | NHL                                                                                | 1996-2012        | 15-39                    | 2-years post-diagnosis | 4,392 HIV-uninfected and 425 HIV-infected | Median 9.5 and 9.3 years for HIV-uninfected and HIV-infected, respectively | HIV-uninfected patients had a higher risk of second cancers if they were female (HR 1.52, 95% CI 1.09-2.11). | HIV-uninfected patients: Female (vs. male) | HIV-uninfected: Public/no health insurance (vs. private); Non-Hispanic White, non-Hispanic Black, non-Hispanic Asian/Pacific Islander (vs. non-Hispanic White); Low neighbourhood SES (vs. high); Lymphoblastic lymphoma, NK/T cell lymphoma, unspecified (vs. B |

| Reference           | Country of origin | Purpose                                                                                                                                                   | Data source                                                                                                    | Cancer type        | Diagnosis period | Age at diagnosis (years) | Survival entry date    | Number of AYA participants | Follow-up time                                      | Results                                                                                                                                                                                                                                                                                                                                                                                                                                                                             | Statistically significant risk factors                                                                      | Non-significant risk factors                                                                                                                                                                                                  |
|---------------------|-------------------|-----------------------------------------------------------------------------------------------------------------------------------------------------------|----------------------------------------------------------------------------------------------------------------|--------------------|------------------|--------------------------|------------------------|----------------------------|-----------------------------------------------------|-------------------------------------------------------------------------------------------------------------------------------------------------------------------------------------------------------------------------------------------------------------------------------------------------------------------------------------------------------------------------------------------------------------------------------------------------------------------------------------|-------------------------------------------------------------------------------------------------------------|-------------------------------------------------------------------------------------------------------------------------------------------------------------------------------------------------------------------------------|
| Gingrich, 2020 [38] | United States     | To evaluate whether the development of medical conditions, 2 years after diagnosis, differed by socio-economic factors among AYA diagnosed with melanoma. | California Cancer Registry linked to data from the Office of Statewide Health Planning and Development (OSHDP) | Cutaneous melanoma | 1996-2012        | 15-39                    | 2-years post-diagnosis | 8,259                      | NR: Results reported for 10-years post diagnosis is | Compared to AYA 15-24 years of age, those 35-39 had higher risk of subsequent Melanoma (HR=1.3, 95%CI 1.1-1.7) and subsequent cancers other than melanoma (HR=1.3, 95% CI 1.0-1.6). Subsequent cancers were developed in males more than females (HR= 1.5, 95% CI 1.3-1.7), people with public/no insurance more than people with private insurance (HR= 2.3, 95% CI 1.9-2.8). Differences in ethnicity, neighbourhood SES and surgery (yes/no) were not statistically significant. | Older age at diagnosis(35-39 vs. 15-24), Male sex (vs. female), Public/No Health insurance (vs. private)    | cell lymphoma); Hematopoietic cell transplant (yes vs. no); Year of diagnosis (2010-2014, 2005-2009, 2001-2004 vs. 1996-2000).                                                                                                |
| Muffly, 2020 [39]   | United States     | To evaluate late effects in AYAs diagnosed with ALL in California.                                                                                        | California Cancer Registry                                                                                     | ALL                | 1995-2012        | 15-39                    | 3-years post-diagnosis | 1,069                      | Median 8.2 years                                    | Cumulative incidence of second cancer was higher among AYAs who had public or no health insurance (vs. private/military) (1.4, 95% CI 1.1-1.9) or who had received HCT (2.54, 95% CI 2.0-3.3).                                                                                                                                                                                                                                                                                      | Public or no health insurance (vs. private/military), Receipt of hematopoietic cell transplant (yes vs. no) | Hispanic, Asian/Pacific Islander, Black, Other/Unknown (vs. non-Hispanic White); Male sex (vs. female); Year of diagnosis 2001-2006 or 2007-2012 (vs. 1995-2000); Neighbourhood SES tertile (Low or Medium vs. High); Cranial |

| Reference | Country of origin | Purpose | Data source | Cancer type | Diagnosis period | Age at diagnosis (years) | Survival entry date | Number of AYA participants | Follow-up time | Results | Statistically significant risk factors | Non-significant risk factors |
|-----------|-------------------|---------|-------------|-------------|------------------|--------------------------|---------------------|----------------------------|----------------|---------|----------------------------------------|------------------------------|
|           |                   |         |             |             |                  |                          |                     |                            |                |         |                                        | irradiation (Yes vs. No)     |

Abbreviations: AER, absolute excess risk; ALL, acute lymphoblastic leukemia; AYA, adolescent and young adult; CI, confidence interval; CNS, central nervous system; HCT, hematopoietic cell transplant; HIV, human immunodeficiency virus; HL, Hodgkin lymphoma; HR, hazard ratio; NHL, non-Hodgkin lymphoma; NR, not reported; OR, odds ratio; SES, socioeconomic status; SIR, standardized incidence ratio; SMN, second malignant neoplasm; SPN, second primary neoplasm

**Table S3.** Risk factors associated with chronic conditions among adolescent and young adult cancer survivors by tumor group (n=34).

| Reference           | Country of origin | Purpose                                                                                                                                                                                                                                | Data source                                                         | Cancer type            | Diagnosis period                                       | Age at diagnosis (years) | Survival entry date    | Number of AYA Participants | Follow-up      | Results                                                                                                                                                                                                                                                                                                                                                                                                                                                                                                                             | Statistically significant risk factors                                                                                                                                                                                                          | Non-significant risk factors                                                                                                                                                                                                                                             |
|---------------------|-------------------|----------------------------------------------------------------------------------------------------------------------------------------------------------------------------------------------------------------------------------------|---------------------------------------------------------------------|------------------------|--------------------------------------------------------|--------------------------|------------------------|----------------------------|----------------|-------------------------------------------------------------------------------------------------------------------------------------------------------------------------------------------------------------------------------------------------------------------------------------------------------------------------------------------------------------------------------------------------------------------------------------------------------------------------------------------------------------------------------------|-------------------------------------------------------------------------------------------------------------------------------------------------------------------------------------------------------------------------------------------------|--------------------------------------------------------------------------------------------------------------------------------------------------------------------------------------------------------------------------------------------------------------------------|
| Mixed-cancer cohort |                   |                                                                                                                                                                                                                                        |                                                                     |                        |                                                        |                          |                        |                            |                |                                                                                                                                                                                                                                                                                                                                                                                                                                                                                                                                     |                                                                                                                                                                                                                                                 |                                                                                                                                                                                                                                                                          |
| Bradley, 2010 [50]  | Canada            | To describe the probability and frequency of hospital admission among childhood and adolescent cancer survivors over a 3-year period and compare to a population sample.                                                               | CAYACS linked to BC's health insurance plan Client Registry         | Any primary malignancy | 1970-1995 records linked from 1998-2000                | 15-19                    | 5-years post-diagnosis | 252                        | NR             | No risk factors reported.                                                                                                                                                                                                                                                                                                                                                                                                                                                                                                           | None presented                                                                                                                                                                                                                                  | NA                                                                                                                                                                                                                                                                       |
| Deyell, 2013 [51]   | Canada            | To determine if childhood and AYA cancer survivorship increased the likelihood of filling an antidepressant prescription.                                                                                                              | CAYACS                                                              | Any primary malignancy | Diagnosed: 1970-1955<br>Linked to Insurance: 2001-2004 | 15-25                    | 5-years post-diagnosis | 1,237                      | NR             | No risk factors reported.                                                                                                                                                                                                                                                                                                                                                                                                                                                                                                           | None presented                                                                                                                                                                                                                                  | Age at diagnosis                                                                                                                                                                                                                                                         |
| Zhang, 2014 [47]    | Canada            | To estimate the risk of late morbidity leading to hospitalization among young adult cancer survivors compared to the general population and to examine long term effects of demographic and disease-related factors on late morbidity. | British Columbia Cancer Registry linked to the Medical Service Plan | Any primary malignancy | 1981-1999                                              | 20-24                    | 5-years post-diagnosis | 902                        | Mean 6.1 years | Survivors of tumors of the bone and CNS had the highest risk of hospitalization (RR= 2.2 (95% CI 0.88-5.49) and 2.09 (95% CI 0.96–4.56), respectively, but the increased risk was not statistically significant compared to the risk of survivors of leukemia. Females (vs. males) (RR=1.5, 95% CI 1.2-1.9), people who received chemotherapy, radiation and surgery (vs. chemotherapy only) (RR=1.8, 95% CI 1.1-3.1) and people living in Interior (RR=1.6, 95% CI 1.1-2.2) or Northern BC (RR=1.5, 95% CI 1.1-2.3) (vs. Vancouver | Female sex (vs. male sex), Living in Interior or Northern B.C. (vs. Vancouver coastal), Treatment modality (chemo, radiation and surgery combined vs. chemo only), Relapse status (Relapse vs. No relapse), Second cancer status (Second cancer | Living in Fraser or Island region of BC (vs. Vancouver coastal), Lowest quintile of SES (vs. Highest quintile of SES), Types of cancer (vs. leukemia), Calendar period of diagnosis (1986-1990, 1991-1995, 1996-1999 vs. 1981-1985), Treatment modality (radiation only, |

| Reference           | Country of origin | Purpose                                                                                                                                         | Data source                                                                                                                                               | Cancer type            | Diagnosis period | Age at diagnosis (years) | Survival entry date    | Number of AYA Participants | Follow-up                                 | Results                                                                                                                                                                                                                                                                                                            | Statistically significant risk factors                                                                                                                                                                               | Non-significant risk factors                                                                |
|---------------------|-------------------|-------------------------------------------------------------------------------------------------------------------------------------------------|-----------------------------------------------------------------------------------------------------------------------------------------------------------|------------------------|------------------|--------------------------|------------------------|----------------------------|-------------------------------------------|--------------------------------------------------------------------------------------------------------------------------------------------------------------------------------------------------------------------------------------------------------------------------------------------------------------------|----------------------------------------------------------------------------------------------------------------------------------------------------------------------------------------------------------------------|---------------------------------------------------------------------------------------------|
|                     |                   |                                                                                                                                                 |                                                                                                                                                           |                        |                  |                          |                        |                            |                                           | coastal) had higher risk of morbidity.                                                                                                                                                                                                                                                                             | vs. No second cancer)                                                                                                                                                                                                | surgery only, chemo and radiation, chemo and surgery, radiation and surgery vs. chemo only) |
| Brewster, 2014 [52] | Scotland          | To research acute and psychiatric hospital admission rates and length of stay in 5-year AYA survivors of cancer diagnosed before the age of 25. | National linked database that includes acute hospital discharge records, psychiatric hospital records, Scottish cancer registration and mortality records | Any primary malignancy | 1981-2003        | 15-24                    | 5-years post diagnosis | 3,053                      | NR: Observed bed days for AYAs was 30,911 | No risk factors reported.                                                                                                                                                                                                                                                                                          | None presented                                                                                                                                                                                                       | NA                                                                                          |
| Kero, 2014 [49]     | Finland           | To investigate cardiac and vascular morbidity among early-onset cancer survivors.                                                               | Finnish Cancer Registry and Finnish Hospital Discharge Registry                                                                                           | Any primary malignancy | 1975-1993        | 20-34                    | 5-years post-diagnosis | 9,401                      | NR                                        | Risks varied by the treatment era and the type/site of cancer, with survivors of melanoma, renal, bone, soft tissue, colon, breast or thyroid cancer not having higher HRs for these cardiovascular outcomes. HR for several adverse outcomes were elevated among survivors of lymphoma and testicular malignancy. | Type of cancer, Earlier treatment era for cardiac arrhythmia, myocardial infarction/cardiac ischemia, atherosclerosis/brain vascular thrombosis (1975-1982 and 1983-1992 generally higher risk for cardiac outcomes) | Female vs. male                                                                             |

| Reference           | Country of origin | Purpose                                                                                                                                                                                                                                                   | Data source                                                          | Cancer type                                  | Diagnosis period | Age at diagnosis (years) | Survival entry date    | Number of AYA Participants | Follow-up            | Results                                                                                                                                                                                                                                                                                                                                                                                                                                                              | Statistically significant risk factors                                                                                                                                                                                                                                               | Non-significant risk factors |
|---------------------|-------------------|-----------------------------------------------------------------------------------------------------------------------------------------------------------------------------------------------------------------------------------------------------------|----------------------------------------------------------------------|----------------------------------------------|------------------|--------------------------|------------------------|----------------------------|----------------------|----------------------------------------------------------------------------------------------------------------------------------------------------------------------------------------------------------------------------------------------------------------------------------------------------------------------------------------------------------------------------------------------------------------------------------------------------------------------|--------------------------------------------------------------------------------------------------------------------------------------------------------------------------------------------------------------------------------------------------------------------------------------|------------------------------|
| Kirchoff, 2014 [53] | United States     | To report on hospitalizations among a population-based cohort of survivors of child and adolescent cancer from the Utah Cancer Registry in relation to a comparison cohort sampled to be similar on birth year and sex from the Utah Population Database. | UPDB; Utah Cancer Registry                                           | Any primary malignancy                       | 1973-2005        | 15-20                    | 5-years post diagnosis | 597                        | Mean 13.5 years      | No risk factors reported.                                                                                                                                                                                                                                                                                                                                                                                                                                            | None presented                                                                                                                                                                                                                                                                       | NA                           |
| Rugbjerg, 2014 [48] | Denmark           | To assess the rates of hospitalization for various cardiovascular conditions among 1-year survivors of AYA cancer and compare them with those of a cancer-free subset of the Danish population.                                                           | Danish Cancer Registry with linkage to the National Patient Register | Any primary malignancy                       | 1943-2009        | 15-39                    | 1-year post-diagnosis  | 43,153                     | Mean 15 years        | HRR highest among survivors of leukemia (HRR=2.5, 95% CI 2.1-2.9), HL (HRR=1.7, 95% CI 1.6-1.9), brain (HRR=1.6, 95% CI 1.5-1.8). Survivors were also at risk of diabetes (HR=1.23, 95% CI 1.17-1.30), COPD (RR=1.23, 95% CI 1.17-1.31) and chronic kidney disease (RR=2.3, 95% CI 2.04-2.60). Men were slightly more at risk for hospitalization for CVD than women, but confidence intervals overlapped (RR 1.34, 95% CI 1.30-1.39 vs. RR 1.28, 95% CI 1.25-1.32). | Type of cancer (leukemia, HL and brain tumor survivors at highest risk), Diagnosis in the earliest calendar years (1943-1959 vs. 1960-2009), Younger attained age (RR of cardiovascular hospitalization higher than more older attained ages), Fewer years since diagnosis (5 years) | Sex                          |
| van Laar, 2014 [54] | United Kingdom    | To define the incidence and risk of cardiovascular late effects identified from inpatient hospital episode statistics (HES)                                                                                                                               | Yorkshire Specialist Register of Cancer in Children and Young People | Any primary malignancy except skin carcinoma | 1991-2006        | 15-29                    | 5-years post-diagnosis | 1,880                      | NR: at least 5 years | No risk factors reported.                                                                                                                                                                                                                                                                                                                                                                                                                                            | None presented                                                                                                                                                                                                                                                                       | NA                           |

| Reference          | Country of origin                          | Purpose                                                                                                                                                     | Data source                                                                                                                   | Cancer type                                                    | Diagnosis period                                  | Age at diagnosis (years) | Survival entry date    | Number of AYA Participants | Follow-up                                                              | Results                                                                                                                                                                                                                                                                                                                                                                             | Statistically significant risk factors      | Non-significant risk factors                                                                                                                                    |
|--------------------|--------------------------------------------|-------------------------------------------------------------------------------------------------------------------------------------------------------------|-------------------------------------------------------------------------------------------------------------------------------|----------------------------------------------------------------|---------------------------------------------------|--------------------------|------------------------|----------------------------|------------------------------------------------------------------------|-------------------------------------------------------------------------------------------------------------------------------------------------------------------------------------------------------------------------------------------------------------------------------------------------------------------------------------------------------------------------------------|---------------------------------------------|-----------------------------------------------------------------------------------------------------------------------------------------------------------------|
|                    |                                            | among long-term survivors of cancer in young people.                                                                                                        | linked to inpatient Hospital Episode Statistics                                                                               | as and melanoma                                                |                                                   |                          |                        |                            |                                                                        |                                                                                                                                                                                                                                                                                                                                                                                     |                                             |                                                                                                                                                                 |
| Ahomaki, 2015 [55] | Finland                                    | To explore the risk of new psychiatric diagnoses in 5-year survivors of childhood and YA cancer compared with a sibling cohort.                             | Finnish Cancer Registry and Central Population Registry and Finish Hospital Discharge Registry                                | Any First primary Malignant Neoplasm . Excluded those with SMN | 1975-2004                                         | 20-34                    | 5-years post-diagnosis | 9,543                      | NR                                                                     | Compared to siblings, YA survivors had higher risk of organic memory/brain disorders (HR= 2.1; 95%CI 1.4–3.1); and mood disorders (HR=1.3; 95%CI 1.1–1.5). Females had significantly increased risk for neurotic/anxiety disorders (HR=1.6, 95% CI 1.2–2.1) compared to their siblings, whereas males did not. Radiotherapy did not explain the differences in psychiatric effects. | female sex (for anxiety/neurotic disorders) | Male sex (compared to siblings), Radiotherapy (vs. no radiotherapy), Decade of diagnosis (no difference in organic memory and brain disorders across 3 decades) |
| Asdahl, 2016 [56]  | Denmark, Finland, Iceland, Norway & Sweden | To assess the frequency of gastrointestinal and liver late effects among childhood cancer survivors and compare this frequency with the general population. | Adult Life after Childhood Cancer in Scandinavia, national cancer registries in Denmark, Finland, Iceland, Norway and Sweden. | Any primary malignancy                                         | 1943-1958 to 2008-2010 (depending on the country) | 15-19                    | 1-year post-diagnosis  | 9,921                      | Median 10 years for cancer survivors and 15 years for comparison group | Survivors had 50% excess gastrointestinal or liver diseases compared to the general population (RR=1.5, 95% CI 1.4-1.6).                                                                                                                                                                                                                                                            | None presented                              | NA                                                                                                                                                              |
| Kero, 2016 [57]    | Finland                                    | To investigate the purchases of medications associated with metabolic syndrome (MetS) among 7,551 early onset                                               | Finnish Cancer Registry linked to Drug                                                                                        | Any primary malignancy                                         | 1994-2004                                         | 20-34                    | At diagnosis           | 2,184                      | Median 9.5 years                                                       | Higher HR for purchasing anti-hypertensives (HR 1.5, 95% CI 1.3-1.8) , diabetes drugs (HR 1.6, 95% CI 1.1-2.2 ) and lipid-lowering drugs (HR=1.6, 95% CI 1.0-2.5) in YA cancer survivors                                                                                                                                                                                            | type of cancer                              | No                                                                                                                                                              |



| Reference           | Country of origin | Purpose                                                                                                                                            | Data source                           | Cancer type                                            | Diagnosis period | Age at diagnosis (years) | Survival entry date    | Number of AYA Participants | Follow-up       | Results                                                                                                                                                                                                                                                                                                                                                                                                                                                                      | Statistically significant risk factors                                                                               | Non-significant risk factors |
|---------------------|-------------------|----------------------------------------------------------------------------------------------------------------------------------------------------|---------------------------------------|--------------------------------------------------------|------------------|--------------------------|------------------------|----------------------------|-----------------|------------------------------------------------------------------------------------------------------------------------------------------------------------------------------------------------------------------------------------------------------------------------------------------------------------------------------------------------------------------------------------------------------------------------------------------------------------------------------|----------------------------------------------------------------------------------------------------------------------|------------------------------|
|                     |                   | cancer patients compared to siblings.                                                                                                              | Purchase Registry                     |                                                        |                  |                          |                        |                            |                 | compared to siblings. Among specific cancer diagnosis groups, highest HR values for anti-hypertensives were found in YA ALL (HR 4.8, 95% CI 3.1-7.0 ) and myeloid leukemia (HR 3.4, 95% CI 2.2-5.1) patients. YA ALL patients showed strongest likelihood of purchasing diabetes drugs compared to siblings (HR 3.7, 95% CI 1.2-9.5)                                                                                                                                         |                                                                                                                      |                              |
| Chao, 2016 [58]     | United States     | To describe the epidemiology and risk factors for CVD (CVD) in survivors of AYA cancer.                                                            | Kaiser Permanente Southern California | Any primary malignancy                                 | 1998-2009        | 15-39                    | 2-years post-diagnosis | 5,673                      | Mean 4.4 years  | For cancer survivors, incidence rate ratio for developing CVD was 2.37 (95% CI 1.9-2.9) compared to patients without cancer. Highest risk in leukemia (IRR=4.23, 95% CI 1.7-10.3) and breast cancer (IRR=3.63, 95% CI 2.4-5.5) survivors. Of the three cardiovascular risk factors examined, having diabetes (IRR=3.18, , 95% CI 1.9-5.5) or hypertension (IRR=3.67, 95% CI 2.4-.5.7) generally imposed a greater risk for CVD than dyslipidemia (IRR=1.79, 95% CI 1.1-2.9). | cardiovascular risk factors (diabetes, hypertension, dyslipidemia vs. not having these risk factors), type of cancer | No                           |
| Rugbjerg, 2016 [40] | Denmark           | To examine relative an absolute excess risk for hospitalizations up to 34 years after diagnosis of AYA cancer compared to a comparison population. | Denmark using Danish Cancer Registry  | Any primary malignancy except non-melanoma skin cancer | 1943-2004        | 15-39                    | 5-years post-diagnosis | 33,555                     | Median 14 years | Highest risk of hospitalization by cancer diagnosis: Survivors of leukemia (RR 2.2, 95% CI 2.0-2.4), HL (RR 1.87, 95% CI 1.80-1.94) and brain cancer (RR 1.93, 95% CI 1.86-2.0).                                                                                                                                                                                                                                                                                             | Type of cancer (mainly leukemia, brain cancer, HL), Younger attained age (younger more at risk than older)           | No                           |

| Reference         | Country of origin | Purpose                                                                                                                                                                                                  | Data source                                                                                                 | Cancer type            | Diagnosis period | Age at diagnosis (years) | Survival entry date    | Number of AYA Participants | Follow-up                                                         | Results                                                                                                                                                                                                                                                                                                                                                                                                                                              | Statistically significant risk factors                                                                                                                                                                                                                                                            | Non-significant risk factors |
|-------------------|-------------------|----------------------------------------------------------------------------------------------------------------------------------------------------------------------------------------------------------|-------------------------------------------------------------------------------------------------------------|------------------------|------------------|--------------------------|------------------------|----------------------------|-------------------------------------------------------------------|------------------------------------------------------------------------------------------------------------------------------------------------------------------------------------------------------------------------------------------------------------------------------------------------------------------------------------------------------------------------------------------------------------------------------------------------------|---------------------------------------------------------------------------------------------------------------------------------------------------------------------------------------------------------------------------------------------------------------------------------------------------|------------------------------|
| Bright, 2017 [45] | England & Wales   | To investigate the risk of hospitalization for specific cerebrovascular events in survivors of all and specific types of cancer in AYAs.                                                                 | Teenage and Young Adult Cancer Survivor Study, England and Wales Linked to Hospital Episode Statistics Data | Any primary malignancy | 1971-2006        | 15-39                    | 5-years post-diagnosis | 178,962                    | Median 11.3 years                                                 | Survivors of CNS tumors (SHR=4.6, 95% CI 4.3-5.0), head and neck tumors (SHR=2.6, 95% CI 2.2-3.1) and leukemia (SHR=2.4, 95% CI 1.9-3.1) were at greatest risk of cerebrovascular events. Males were at higher risk than females (SHRmale=1.5, 95% CI 1.5-1.6 vs. SHRfemales=1.3, 95% 1.2-1.3). Younger survivors were more at risk than older survivors (SHR 15-19=3.6, 95% CI 3.0-4.2 vs. SHR 35-39=1.2, 95% CI 1.2-1.3).                          | Male sex (higher than for female sex), younger age at diagnosis (15-19 age group higher than 35-39 age group), younger attained age (15-19 age group higher than 35-39 age group), type of cancer, later decade of diagnosis (2000-2006 higher than preceding decades)                            | No                           |
| Jensen, 2018 [59] | Denmark           | To investigate the lifetime risks of endocrine late effects of cancer and cancer treatment in adolescent and young adult cancer survivors compared to population-based cancer-free matched participants. | Danish Cancer Registry with linkage to the National Patient Register                                        | Any primary malignancy | 1977-2009        | 15-39                    | 1-year post-diagnosis  | 32,584                     | Median 10 years for cancer survivors and 15 years for cancer-free | Type of cancer with highest RRs for any endocrine disease: Leukemia (RR 3.97, 95% CI 3.10-5.09), HL (RR 3.06, 95% CI 2.62-3.57), and brain cancer (RR 3.03, 95% CI 2.53-3.64). AYAs aged 15-19 had a higher risk of hospital contact for endocrine disease than AYAs aged 30-34 (RR=4.0, 95% CI 3.4-4.8 vs. RR=1.6, 95% CI 1.5-1.8). Females were more at risk of hospitalization for endocrine diseases compared to males (HR=1.9, 95% CI 1.6-2.1). | Younger attained age (16-19 and 20-29 lower than 40-49 and 50-59), type of cancer (compared to brain cancer, colon cancer, cervical cancer, malignant melanoma, ovarian cancer, breast cancer, NHL were less at risk, while leukemia was more at risk), female sex (vs. male sex), younger age at | No                           |

| Reference         | Country of origin | Purpose                                                                                                                                           | Data source                                                  | Cancer type                 | Diagnosis period | Age at diagnosis (years) | Survival entry date    | Number of AYA Participants | Follow-up      | Results                                                                                                                                                                                                                                                                                                                                                                                                                                                                                                                                                                                                                                                                                                                                                                                                                                            | Statistically significant risk factors                                                                                                                                                                                                                                                                                                                                                     | Non-significant risk factors                              |
|-------------------|-------------------|---------------------------------------------------------------------------------------------------------------------------------------------------|--------------------------------------------------------------|-----------------------------|------------------|--------------------------|------------------------|----------------------------|----------------|----------------------------------------------------------------------------------------------------------------------------------------------------------------------------------------------------------------------------------------------------------------------------------------------------------------------------------------------------------------------------------------------------------------------------------------------------------------------------------------------------------------------------------------------------------------------------------------------------------------------------------------------------------------------------------------------------------------------------------------------------------------------------------------------------------------------------------------------------|--------------------------------------------------------------------------------------------------------------------------------------------------------------------------------------------------------------------------------------------------------------------------------------------------------------------------------------------------------------------------------------------|-----------------------------------------------------------|
|                   |                   |                                                                                                                                                   |                                                              |                             |                  |                          |                        |                            |                |                                                                                                                                                                                                                                                                                                                                                                                                                                                                                                                                                                                                                                                                                                                                                                                                                                                    | cancer diagnosis (reference group, 15-19, most at risk), later period of diagnosis (1990-2009 vs. 1975-1989), fewer years since diagnosis (1-4 years less than >20 years)                                                                                                                                                                                                                  |                                                           |
| Keegan, 2018 [46] | United States     | To examine associations of SES characteristics with CVD after consideration for clinical factors among 2-year survivors of 14 common AYA cancers. | California Cancer Registry and State hospital discharge data | 14 first primary AYA cancer | 1996-2012        | 15-39                    | 2-years post-diagnosis | 79,176                     | Median 9 years | 2.8% of survivors developed CVD. Highest 10-year CVD incidence in survivors of CNS cancer (7.3%, 95% CI 6.4-8.3), ALL (6.9%, 95% CI 5.2-8.7) AML (6.8%, 95% CI 5.3-8.7)) and NHL (4.1%, 95% CI 3.5-4.8). Risk of CVD was elevated for older AYAs (HR=2.6, 95% CI 2.1-3.2) (vs. younger), non-Hispanic Blacks (HR=1.6, 95% CI 1.3-1.8) (vs. non-Hispanic Whites), people with public/no health insurance (HR=1.8, 95% CI 1.6-2.0) (vs. military/private), people living in the lowest SES neighbourhoods (HR=1.6, 95% CI 1.4-1.9) (vs. highest). Risk of developing CVD was lower for females (HR=0.7, 95% CI 0.6-0.8) (vs. males). CVD incidence was higher for people who received chemotherapy (3.5% vs. 2.0% for radiation only) and a stem cell transplant (7.1% vs. 2.5% for no transplant). Diabetes, obesity, hypertension and dislipidemia | Non-Hispanic Black (vs. Non-Hispanic White), public or no health insurance (vs. private/military), residing in lower SES neighbourhoods (lowest quintile vs. highest quintile) (acute lymphoid leukemia, AML, bone sarcoma, central nervous system, breast, cervical, HL, melanoma, NHL, soft tissue sarcoma, testicular vs. thyroid), male sex (vs. female), chemotherapy or chemotherapy | Hispanic, Asian/Pacific Islander (vs. Non-Hispanic White) |

| Reference                 | Country of origin | Purpose                                                                                                                               | Data source                                                                                                  | Cancer type            | Diagnosis period | Age at diagnosis (years) | Survival entry date    | Number of AYA Participants | Follow-up        | Results                                                                                                                                                                            | Statistically significant risk factors                                                                                                                                                                                                 | Non-significant risk factors |
|---------------------------|-------------------|---------------------------------------------------------------------------------------------------------------------------------------|--------------------------------------------------------------------------------------------------------------|------------------------|------------------|--------------------------|------------------------|----------------------------|------------------|------------------------------------------------------------------------------------------------------------------------------------------------------------------------------------|----------------------------------------------------------------------------------------------------------------------------------------------------------------------------------------------------------------------------------------|------------------------------|
|                           |                   |                                                                                                                                       |                                                                                                              |                        |                  |                          |                        |                            |                  | were also positively associated with the development of CVD.                                                                                                                       | and radiation as initial treatment, stem cell transplant (yes vs. no), type of cancer, older age at diagnosis (35-39 vs. 15-19), earlier year of diagnosis (1996-2000 vs. 2009-2012), no surgery (vs. yes), distant stage at diagnosis |                              |
| Krawczuk-Rybak, 2018 [60] | Poland            | To analyze the general health status and epidemiology of organ late effects in the cohort of Polish childhood cancer survivors.       | National database in Poland                                                                                  | Any primary malignancy | NR               | 15-18                    | 2-years post-treatment | 197                        | NR               | No risk factors reported.                                                                                                                                                          | None presented                                                                                                                                                                                                                         | NA                           |
| Nathan, 2018 [61]         | Canada            | To evaluate risk factors for mental health problems in survivors of childhood cancer in Ontario, Canada.                              | Collection of Ontario health databases - Pediatric Oncology Group of Ontario's Networked Information System, | Any primary malignancy | 1987-2008        | 15-18                    | 5-years post diagnosis | 537                        | Median 7.5 years | No risk factors reported.                                                                                                                                                          | None presented                                                                                                                                                                                                                         | NA                           |
| Ahomaki, 2019 [62]        | Finland           | To determine if cancer patients have an increased risk for first time anti-depressant purchases and, if so, if gender, type of cancer | Finnish Cancer Registry                                                                                      | Any primary malignancy | 1994-2004        | 20-34                    | At diagnosis           | 4,598                      | NR               | In both patients and siblings, females had a higher risk than males for AD purchases (p<0.001). Patients with leukemia and had the highest HR of AD purchase (HR =9.1, 95% CI 6.9- | Female sex, type of cancer (leukemia, CNS)                                                                                                                                                                                             | No                           |

| Reference                | Country of origin | Purpose                                                                                                                                                                                                                                                                                 | Data source                                                                                                                                        | Cancer type                                                    | Diagnosis period | Age at diagnosis (years) | Survival entry date    | Number of AYA Participants | Follow-up      | Results                                                                                                                                                                                                                                                                                                                                                                                                                                                                                                                                                    | Statistically significant risk factors                                                                                      | Non-significant risk factors |
|--------------------------|-------------------|-----------------------------------------------------------------------------------------------------------------------------------------------------------------------------------------------------------------------------------------------------------------------------------------|----------------------------------------------------------------------------------------------------------------------------------------------------|----------------------------------------------------------------|------------------|--------------------------|------------------------|----------------------------|----------------|------------------------------------------------------------------------------------------------------------------------------------------------------------------------------------------------------------------------------------------------------------------------------------------------------------------------------------------------------------------------------------------------------------------------------------------------------------------------------------------------------------------------------------------------------------|-----------------------------------------------------------------------------------------------------------------------------|------------------------------|
|                          |                   | or age at diagnosis affect the risk.                                                                                                                                                                                                                                                    |                                                                                                                                                    |                                                                |                  |                          |                        |                            |                | 12.1) followed by CNS (HR=7.0 95% CI 5.6-8.7)                                                                                                                                                                                                                                                                                                                                                                                                                                                                                                              |                                                                                                                             |                              |
| Smith, 2019 [43]         | United Kingdom    | To quantify the incidence of hospitalizations due to respiratory disease in long-term survivors of childhood and young adult cancer, identify treatment related risk factors associated with risk of respiratory admissions, and describe patterns of readmission/subsequent mortality. | Cancer registries in Yorkshire, England-Specialist Register of Cancer in Children and Young People linked to inpatient Hospital Episode Statistics | Any primary malignancy excluding skin carcinomas and melanomas | 1990-2011        | 15-29                    | 5-years post-diagnosis | 2,627                      | NR             | AYA cancer survivors diagnosed with carcinomas and leukemia were had the highest risk of respiratory admission (hospital rate ratio = 2.11 (95% CI 1.65-2.71) and 2.09 (95% CI 1.47-2.98), respectively)                                                                                                                                                                                                                                                                                                                                                   | Type of cancer (respiratory admissions for leukemia, carcinomas significantly higher than for CNS tumors, germ cell tumors) | NA                           |
| de Fine Licht, 2019 [44] | Denmark           | To report of both hospital contacts and purchase of prescription drugs associated with MetS among survivors of AYA cancer and compare such events with those in a subset of the general population.                                                                                     | Denmark-Nationwide registries                                                                                                                      | Any primary malignancy                                         | 1994-2009        | 15-39                    | 5-years post-diagnosis | 11,822                     | Mean 8.3 years | Highest risks for hospitalization for diabetes in survivors of brain cancer (RR 2.9 95% CI 1.9-4.4) and HL (RR 2.4, 95% CI 1.4-4.0). These groups were also most likely to purchase a prescription for MetS-related diseases. Compared to the population cohort, men purchased more drugs for hyperlipidemia (standardized prescription rate ratio (SPRR)=1.2, 95% CI 1.1-1.3) and hypertension (SPRR=1.2, 95% CI 1.3-1.5) while women purchased more drugs against hyperlipidemia (SPRR=1.1, 95% CI 1.0-1.3) and hypertension (SPRR=1.2, 95% CI 1.1-1.3). | Type of cancer (varied by outcome), male sex (for both hospital contact and prescription drugs), Earlier age at diagnosis   | Attained age                 |

| Reference           | Country of origin | Purpose                                                                                                                                                                         | Data source                          | Cancer type                                | Diagnosis period              | Age at diagnosis (years) | Survival entry date    | Number of AYA Participants | Follow-up                       | Results                                                                                                                                                                                                                                                                                                                                                                                                                                                      | Statistically significant risk factors                                                                                                                                                                          | Non-significant risk factors              |
|---------------------|-------------------|---------------------------------------------------------------------------------------------------------------------------------------------------------------------------------|--------------------------------------|--------------------------------------------|-------------------------------|--------------------------|------------------------|----------------------------|---------------------------------|--------------------------------------------------------------------------------------------------------------------------------------------------------------------------------------------------------------------------------------------------------------------------------------------------------------------------------------------------------------------------------------------------------------------------------------------------------------|-----------------------------------------------------------------------------------------------------------------------------------------------------------------------------------------------------------------|-------------------------------------------|
| Anderson, 2020 [41] | United States     | To examine the risk of inpatient hospitalizations among AYA cancer survivors compared with their siblings and the general population.                                           | Utah Population Database             | Any primary malignancy                     | 1994-2015                     | 15-39                    | 2-years post-diagnosis | 6,330                      | Median 4.9 years                | Risk was most elevated for survivors of leukemia (HR=4.8, 95% CI:3.9-5.9), central nervous system (HR=3.5, 95% CI:2.8-4.2), colorectal cancers (HR=2.8, 95% CI 2.2-3.6), NHL (HR=2.8, 95% CI 2.2-3.5) and breast cancer (HR=2.4, 95% CI 2.0-2.8). The hospitalization patterns observed were similar when comparing AYA cancer survivors to their siblings. Males were hospitalized more than females, relative to their siblings (HR=1.8, 95% CI 1.6, 1.9). | Type of primary cancer (vs. matched population); male survivor (vs. matched population, HR for first hospitalization higher than that for females vs. matched population)                                       | No                                        |
| Bhandari, 2020 [63] | United States     | To evaluate the association between BMI, treatment related toxicity and treatment outcome in children with solid tumors treated with cisplatin-containing regimens.             | Los Angeles Children's Hospital      | Solid tumors or non-hematologic malignancy | 2009-2017-period of treatment | 15-20                    | At diagnosis           | 54                         | Median 3.1 years post-diagnosis | No risk factors reported.                                                                                                                                                                                                                                                                                                                                                                                                                                    | None presented                                                                                                                                                                                                  | NA                                        |
| Chao, 2020 [64]     | United States     | To evaluate the development of chronic comorbidities in survivors of AYA cancer who were members of Kaiser Permanente Southern California (KPSC) using a matched cohort design. | KPSC SEER-affiliated cancer registry | Any primary malignancy                     | 2000-2012                     | 15-39                    | 2-years post diagnosis | 6,778                      | Median 5.1 years                | In adjusted analyses, use of trastuzumab was significantly associated with risk of cardiomyopathy or heart failure (IRR=8.1, 95% CI 2.5-25.5); head/brain/neck radiation was associated with the risk of stroke (IRR=3.5, 95% CI 5.9-37.2), thyroid disorders (IRR=3.1, 95% CI 2.2-4.4), diabetes (IRR=1.9, 95% CI 1.3-2.9). The risk of developing diabetes was significantly elevated for AYAs aged 30-39 (vs. 15-29) (IRR=2.4,                            | Risk factors varied by outcome. Cardiomyopathy/ heart failure: hearing loss, stroke, diabetes; age at diagnosis (older vs. younger) for cardiomyopathy/ heart failure, hearing loss, stroke, thyroid disorders; | Sex (female vs. male) for cardiomyopathy/ |

| Reference     | Country of origin | Purpose                                                                                                                     | Data source                                                                                                | Cancer type    | Diagnosis period              | Age at diagnosis (years) | Survival entry date               | Number of AYA Participants | Follow-up                           | Results                                                                                                                                                                                                                                                                                                                                                                                                   | Statistically significant risk factors                                                                                                                                                                                                                                                                                                                                                                          | Non-significant risk factors                                                                                      |
|---------------|-------------------|-----------------------------------------------------------------------------------------------------------------------------|------------------------------------------------------------------------------------------------------------|----------------|-------------------------------|--------------------------|-----------------------------------|----------------------------|-------------------------------------|-----------------------------------------------------------------------------------------------------------------------------------------------------------------------------------------------------------------------------------------------------------------------------------------------------------------------------------------------------------------------------------------------------------|-----------------------------------------------------------------------------------------------------------------------------------------------------------------------------------------------------------------------------------------------------------------------------------------------------------------------------------------------------------------------------------------------------------------|-------------------------------------------------------------------------------------------------------------------|
|               |                   |                                                                                                                             |                                                                                                            |                |                               |                          |                                   |                            |                                     | 95% CI 1.7-3.5), but not for cardiomyopathy/heart failure, hearing loss, stroke or thyroid disorders. Females were more at risk than men for developing thyroid disorders (IRR=2.1, 95% CI 1.4-3.0). Non-Hispanic Blacks (IRR=2.3, 95% CI 1.4-3.5), Hispanics (IRR=2.2, 95% CI 1.6-3.0) and Asian/Pacific Islanders (IRR=1.8, 95% CI 1.1-2.8) all had a higher risk of diabetes than non-Hispanic Whites. | Gy vs. Platinum =< 450 g/m2 or radiation 0-29.9 Gy). Stroke: Head/brain/neck radiation (>= 30 Gy vs. 0-29.9 Gy). Thyroid disorders: Female sex (vs. male), Head/brain/neck radiation (>= 30 Gy vs. 0-29.9 Gy). Diabetes: Age Older age at cancer diagnosis (30-39 vs. 15-29), Asian/Pacific Islander, Hispanic, Non-Hispanic Black (vs. Non-Hispanic White), Head/brain/neck radiation (>= 30 Gy vs. 0-29.9 Gy) | race/ethnicity (vs. Non-Hispanic White) for cardiomyopathy/heart failure, hearing loss, stroke, thyroid disorders |
| Yu, 2020 [65] | United States     | To determine the association between pubertal development and post pubertal gonadal function in childhood cancer survivors. | Walter Reed National Military Medical Center childhood cancer survivor clinic registry and medical records | Any malignancy | 1985-2010-period of follow-up | 15-18                    | At completion of cancer treatment | 7                          | Mean 9 years after cancer treatment | No risk factors reported.                                                                                                                                                                                                                                                                                                                                                                                 | None presented                                                                                                                                                                                                                                                                                                                                                                                                  | NA                                                                                                                |

| Reference               | Country of origin      | Purpose                                                                                                                       | Data source                                               | Cancer type                                                                                         | Diagnosis period | Age at diagnosis (years) | Survival entry date    | Number of AYA Participants | Follow-up         | Results                                                                                                                                                                                                                                                                                                                                                                                                                                                                                                                                                                    | Statistically significant risk factors                                                                               | Non-significant risk factors                                                                                    |
|-------------------------|------------------------|-------------------------------------------------------------------------------------------------------------------------------|-----------------------------------------------------------|-----------------------------------------------------------------------------------------------------|------------------|--------------------------|------------------------|----------------------------|-------------------|----------------------------------------------------------------------------------------------------------------------------------------------------------------------------------------------------------------------------------------------------------------------------------------------------------------------------------------------------------------------------------------------------------------------------------------------------------------------------------------------------------------------------------------------------------------------------|----------------------------------------------------------------------------------------------------------------------|-----------------------------------------------------------------------------------------------------------------|
| Suh, 2020 [42]          | United States & Canada | To describe chronic health conditions and all-cause and specific mortality among survivors of early-adolescent and YA cancer. | Childhood Cancer Survivorship Study                       | Leukemia, CNS malignancy, HL, NHL, Wilms tumor, Neuroblastoma, Soft-tissue sarcoma, and Bone cancer | 1970-1999        | 15-20                    | 5-years post-diagnosis | 4,082                      | Median 16.9 years | Cardiac conditions were higher among people who received chest radiation therapy of $\geq 35$ Gy (vs. none) (HR=3.3, 95% CI 2.4-4.6) and lower among females (vs. males) (HR=0.6, 95% CI 0.5-0.7). Endocrine conditions were higher among people who had total body radiation therapy (HR=3.3, 95% CI 1.4-7.8) or chest/neck radiation therapy (HR=3.9, 95% CI 2.6-5.7) (vs. none), and females (vs. males) (HR=3.2, 95% CI 2.4-4.3). Pulmonary conditions were higher among people who received chest radiation therapy $\geq 35$ Gy (vs. none) (HR=3.1, 95% CI 1.6-6.2). | Female sex (vs. male) for endocrine conditions; male sex (vs. female) for cardiac conditions; radiation (yes vs. no) | Sex (female vs. male) for pulmonary conditions, Race/ethnicity (Hispanic or "non-White" vs. non-Hispanic White) |
| Hodgkin lymphoma cohort |                        |                                                                                                                               |                                                           |                                                                                                     |                  |                          |                        |                            |                   |                                                                                                                                                                                                                                                                                                                                                                                                                                                                                                                                                                            |                                                                                                                      |                                                                                                                 |
| van Nimwegen, 2015 [66] | Netherlands            | To examine excess risk of CVD in HL up to 40 years after treatment relative to the risk in the general population.            | Dutch university hospitals or cancer centers              | HL                                                                                                  | 1965-1995        | 18-39                    | 5-years post diagnosis | 1,864                      | Median 20.3 years | Younger age at treatment was significantly associated with greater risk of both CHD (<18 at treatment: SIR=8.8, 95% CI 6.3-12.3; 25-29 at first treatment: SIR=4.1, 95% CI 3.3-5.1) and HF (<18 at treatment: SIR=38.9, 95% CI 25.2-57.4; 25-29 at first treatment: SIR=10.4, 95% CI 7.5-14.2).                                                                                                                                                                                                                                                                            | Younger age at treatment                                                                                             | No                                                                                                              |
| Keegan, 2018 [67]       | United States          | To examine the impact of race/ethnicity, neighbourhood SES and health insurance on the occurrence of medical                  | California Cancer Registry linked to hospitalization data | HL                                                                                                  | 1996-2012        | 15-39                    | 2-years post-diagnosis | 5,085                      | Median 9.5 years  | In multivariable analyses, Black HL survivors were more likely to experience circulatory system (HR=1.6, 95% CI 1.2-2.1) and endocrine (HR=1.4, 95% CI 1.1-1.8), but not respiratory, liver, kidney or thyroid diseases                                                                                                                                                                                                                                                                                                                                                    | Race/ethnicity (Black vs. Non-Hispanic White), residing in low SES neighbourhoods (vs. high),                        | Race/ethnicity (Hispanic or Non-Hispanic Asian/Pacific Islander vs. White), earlier year of diagnosis           |



| Reference                   | Country of origin | Purpose                                                                                   | Data source                                                                                                                                                      | Cancer type                                                                                   | Diagnosis period | Age at diagnosis (years) | Survival entry date    | Number of AYA Participants | Follow-up                           | Results                                                                                                                                                                                                                                                                                                                                                                                                                                                                                                                       | Statistically significant risk factors                                                                                                                        | Non-significant risk factors                                                                                                                                                                                                                                                               |
|-----------------------------|-------------------|-------------------------------------------------------------------------------------------|------------------------------------------------------------------------------------------------------------------------------------------------------------------|-----------------------------------------------------------------------------------------------|------------------|--------------------------|------------------------|----------------------------|-------------------------------------|-------------------------------------------------------------------------------------------------------------------------------------------------------------------------------------------------------------------------------------------------------------------------------------------------------------------------------------------------------------------------------------------------------------------------------------------------------------------------------------------------------------------------------|---------------------------------------------------------------------------------------------------------------------------------------------------------------|--------------------------------------------------------------------------------------------------------------------------------------------------------------------------------------------------------------------------------------------------------------------------------------------|
|                             |                   | conditions in AYA HL survivors.                                                           |                                                                                                                                                                  |                                                                                               |                  |                          |                        |                            |                                     | compared to non-Hispanic Whites. Having public or no health insurance (vs. private/military) was associated with a higher risk of conditions ranging from circulatory (HR=1.4, 95% 1.2-1.7) to chronic kidney disease (HR=1.8, 95% CI 1.3-2.5), but not for thyroid conditions. Low neighbourhood SES (vs. high) was associated with an increased risk of respiratory diseases (HR=1.3, 95% CI 1.1-1.5). Circulatory system, respiratory system and hypothyroidism occurred more frequently among AYAs who received RT alone. | public/no insurance (vs. private/military), stem cell transplant (yes vs. no), disease stage (III/IV generally more at risk for medical conditions than I/II) | (2001-2004, 2005-2008, 2009-2012 vs. 1996-2000)                                                                                                                                                                                                                                            |
| Other tumor-specific cohort |                   |                                                                                           |                                                                                                                                                                  |                                                                                               |                  |                          |                        |                            |                                     |                                                                                                                                                                                                                                                                                                                                                                                                                                                                                                                               |                                                                                                                                                               |                                                                                                                                                                                                                                                                                            |
| Bhuller, 2016 [32]          | Canada            | To highlight specific, long-term morbidity and mortality issues for TYA patients with HL. | Childhood, Adolescent and Young Adult Cancer Survivors (CAYACS) Research Program in British Columbia; cases identified from the British Columbia Cancer Registry | First primary malignancy: HL. SMN: Any cancer based on ICDO-3 with behaviour code 3 or higher | 1981-1999        | 15-24                    | 5 years post-diagnosis | 281                        | Median 19.6 years post diagnosis is | Risk of morbidity requiring hospitalization is 2.5 fold for survivors diagnosed between 1996–1999 compared to survivors diagnosed between 1981–1985.                                                                                                                                                                                                                                                                                                                                                                          | more recent eras of therapy (1996-1999 vs. 1981-1985)                                                                                                         | Sex (Female vs. Male), Age at diagnosis 20-24 vs. 15-29), Rural vs. urban, region of residence (Interior, Fraser, Island, Northern vs. Vancouver coastal), Quintile of SES (Lowest vs. highest), Chemotherapy (Yes vs. No), Radiation (Yes vs. No), Surgical related therapy (Yes vs. no), |

| Reference           | Country of origin | Purpose                                                                                                                                                                       | Data source                                                  | Cancer type        | Diagnosis period | Age at diagnosis (years) | Survival entry date    | Number of AYA Participants                | Follow-up                                                                  | Results                                                                                                                                                                                                                                                                                                                                                                                                                                                                                                                                                                                                                                                                     | Statistically significant risk factors                                                                                                                                               | Non-significant risk factors                                                                                                                                                                                                                                                                                |
|---------------------|-------------------|-------------------------------------------------------------------------------------------------------------------------------------------------------------------------------|--------------------------------------------------------------|--------------------|------------------|--------------------------|------------------------|-------------------------------------------|----------------------------------------------------------------------------|-----------------------------------------------------------------------------------------------------------------------------------------------------------------------------------------------------------------------------------------------------------------------------------------------------------------------------------------------------------------------------------------------------------------------------------------------------------------------------------------------------------------------------------------------------------------------------------------------------------------------------------------------------------------------------|--------------------------------------------------------------------------------------------------------------------------------------------------------------------------------------|-------------------------------------------------------------------------------------------------------------------------------------------------------------------------------------------------------------------------------------------------------------------------------------------------------------|
|                     |                   |                                                                                                                                                                               |                                                              |                    |                  |                          |                        |                                           |                                                                            |                                                                                                                                                                                                                                                                                                                                                                                                                                                                                                                                                                                                                                                                             |                                                                                                                                                                                      | Having late relapse (Yes vs. No), Having SMN (Yes vs. No)                                                                                                                                                                                                                                                   |
| Gunn, 2015 [68]     | Finland           | To evaluate late morbidity of survivors diagnosed in AYA survivors of brain tumors.                                                                                           | Finnish Cancer Registry and Hospital Discharge Registry      | Brain tumors       | 1970-2004        | 16-24                    | 5-years post-diagnosis | 315                                       | Median 11.5 years                                                          | Diseases of the nervous system (HR=3.3, 95% CI 1.8-6.2) were elevated in survivors who had received irradiation treatment compared to survivors who did not.                                                                                                                                                                                                                                                                                                                                                                                                                                                                                                                | Radiation therapy (vs. no radiation)                                                                                                                                                 | No                                                                                                                                                                                                                                                                                                          |
| Abraham, 2020 [37]  | United States     | To estimate the cumulative incidence of late effects at 10 years among HIV-uninfected and HIV-infected AYAs diagnosed with NHL during 1996-2012, who survived $\geq 2$ years. | California Cancer Registry                                   | NHL                | 1996-2012        | 15-39                    | 2-years post-diagnosis | 4,392 HIV-uninfected and 425 HIV-infected | Median 9.5 and 9.3 years for HIV-uninfected and HIV-infected, respectively | For HIV-uninfected survivors, having public/no insurance (vs. private) was associated with an increased risk of all studied conditions, except avascular necrosis. HRs ranged from 1.5 (95% CI 1.3-1.8) for endocrine conditions, to 2.4 (95% CI 1.5-3.8) for neurologic conditions. Race/ethnicity was significantly associated with an increased risk of renal disease for Black (HR=1.9, 95% CI 1.0-3.6) and Hispanic (HR=1.7, 95% CI 1.1-2.7) survivors (vs. White). Low neighbourhood SES (vs. high) was associated with higher risk of cardiovascular 9HR=1.4, 95% CI 1.2-1.7), respiratory (HR=1.4, 95% CI 1.0-1.8) and endocrine diseases (HR=1.4, 95% CI 1.2-1.6). | HIV-uninfected survivors: public or no health insurance (vs. private), residence in lower SES neighbourhood (vs. high), receipt of a hematopoietic stem cell transplant (Yes vs. no) | HIV-uninfected survivors: Sex (Female vs. Male for cardiovascular, respiratory, liver/pancreatic, endocrine, neurologic, avascular necrosis), Non-Hispanic Black, Hispanic, Non-Hispanic Asian/Pacific Islander (vs. Non-Hispanic White), Year of diagnosis (2001-2004, 2005-2009, 2010-2014 vs. 1996-2000) |
| Gingrich, 2020 [38] | United States     | To evaluate whether the development of medical conditions, 2 years after diagnosis, differed by socio-economic factors                                                        | California Cancer Registry linked to data from the Office of | Cutaneous melanoma | 1996-2012        | 15-39                    | 2-years post-diagnosis | 8,259                                     | NR                                                                         | Compared to AYA 15-24, a higher risk of endocrine disorders was found among AYA 35-39 (HR:1.4, 95%CI 1.1-1.7); and higher risk of lymphedema was found among                                                                                                                                                                                                                                                                                                                                                                                                                                                                                                                | Risk factors varied by condition. Older age at diagnosis (35-39 vs. 15-24) for endocrine                                                                                             | Race/ethnicity (Hispanic, "Other" vs. Non-Hispanic White),                                                                                                                                                                                                                                                  |

| Reference         | Country of origin | Purpose                                                                  | Data source                               | Cancer type   | Diagnosis period | Age at diagnosis (years) | Survival entry date    | Number of AYA Participants | Follow-up                      | Results                                                                                                                                                                                                                                                                                                                                                                                                                                                   | Statistically significant risk factors                                                                                                                                                                                                                | Non-significant risk factors                                                                                                                                                                                                                           |
|-------------------|-------------------|--------------------------------------------------------------------------|-------------------------------------------|---------------|------------------|--------------------------|------------------------|----------------------------|--------------------------------|-----------------------------------------------------------------------------------------------------------------------------------------------------------------------------------------------------------------------------------------------------------------------------------------------------------------------------------------------------------------------------------------------------------------------------------------------------------|-------------------------------------------------------------------------------------------------------------------------------------------------------------------------------------------------------------------------------------------------------|--------------------------------------------------------------------------------------------------------------------------------------------------------------------------------------------------------------------------------------------------------|
|                   |                   | among AYA diagnosed with melanoma.                                       | Statewide Health Planning and Development |               |                  |                          |                        |                            |                                | AYA 30-34 (HR:1.3, 95%CI 1.02-1.3) and among AYA 35-39 (HR:1.7, 95%CI 1.4-2.1)                                                                                                                                                                                                                                                                                                                                                                            | disorders, lymphedema; Male sex (vs. female); Public/no insurance (vs. private); Low neighbourhood SES (vs. high) for hematologic disorders, cardiac disease, diabetes, endocrine disorders, lymphedema, VTW, autoimmune disorders, infection/sepsis; | surgery (no vs. yes)                                                                                                                                                                                                                                   |
| Muffly, 2020 [39] | United States     | To evaluate late effects in AYAs diagnosed with ALL (ALL) in California. | California Cancer Registry                | ALL           | 1995-2012        | 15-39                    | 3-years post-diagnosis | 1,069                      | Median 8.2 years IQR: 4.9-13.8 | Having public or no health insurance (compared to private/military) and receipt of hematopoietic cell transplantation were associated with increased HR of all late effects. AYAs diagnosed between 2007-2012 were more likely to developed endocrine diseases (HR 1.48, 95% CI 1.11-1.98), while AYAs diagnosed between 2001 and 2006 were less likely to have an avascular event (HR 0.70, 95% CI 0.52-0.95) relative to AYAs diagnosed from 1995-2000. | Public or no health insurance (vs. private/military), receipt of hematopoietic cell transplant (yes vs. no)                                                                                                                                           | Race/ethnicity (Hispanic, Asian/Pacific Islander, Non-Hispanic Black vs. Non-Hispanic White), Sex (male vs. female), Era of diagnosis (2007-2012, 2001-2006 vs. 1995-2000), Neighbourhood SES tertile (low vs. high), cranial irradiation (yes vs. no) |
| Perisa, 2020 [69] | United States     | To examine clinical features at presentation, treatment factors,         | Nationwide Children's Hospital            | Ewing Sarcoma | 1990-2017        | 15-39                    | At diagnosis           | 45                         | Median 98 months               | No risk factors reported.                                                                                                                                                                                                                                                                                                                                                                                                                                 | None presented                                                                                                                                                                                                                                        | NA                                                                                                                                                                                                                                                     |

| Reference | Country of origin | Purpose                                                                                   | Data source    | Cancer type | Diagnosis period | Age at diagnosis (years) | Survival entry date | Number of AYA Participants | Follow-up | Results | Statistically significant risk factors | Non-significant risk factors |
|-----------|-------------------|-------------------------------------------------------------------------------------------|----------------|-------------|------------------|--------------------------|---------------------|----------------------------|-----------|---------|----------------------------------------|------------------------------|
|           |                   | toxicities, and outcomes in Ewing sarcoma AYA survivors compared with pediatric patients. | Columbus, Ohio |             |                  |                          |                     |                            |           |         |                                        |                              |

Abbreviations: AER, absolute excess risk; ALL, acute lymphoblastic leukemia; AYA, adolescent and young adult; CI, confidence interval; CNS, central nervous system; CVD, cardiovascular disease; HIV, human immunodeficiency virus; HL, Hodgkin lymphoma; HR, hazard ratio; IRR, incidence rate ratio; MetS, metabolic syndrome; NHL, non-Hodgkin lymphoma; NR, not reported; OR, odds ratio; RR, rate ratio; SBD, standardized bed day ratio; SES, socioeconomic status; SHR, standardized hospitalization ratio; SIR, standardized incidence ratio; SMN, second malignant neoplasm; SPN, second primary neoplasm; YA, young adult

**Table S4.** Risk factors associated with late mortality among adolescent and young adult cancer survivors by tumor group (n=54).

| Reference            | Country of origin                          | Purpose                                                                                                                                                                                                                                                     | Data source                                                    | Cancer type                                 | Diagnosis period | Age at diagnosis (years) | Survival entry date    | Number of AYA participants                                             | Follow-up time                                                                                  | Results                                                                                                                                                                                                                                                                                                                                                                                                                                                                      | Statistically significant risk factors                                                                                                                                                                                                                  | Non-significant risk factors |
|----------------------|--------------------------------------------|-------------------------------------------------------------------------------------------------------------------------------------------------------------------------------------------------------------------------------------------------------------|----------------------------------------------------------------|---------------------------------------------|------------------|--------------------------|------------------------|------------------------------------------------------------------------|-------------------------------------------------------------------------------------------------|------------------------------------------------------------------------------------------------------------------------------------------------------------------------------------------------------------------------------------------------------------------------------------------------------------------------------------------------------------------------------------------------------------------------------------------------------------------------------|---------------------------------------------------------------------------------------------------------------------------------------------------------------------------------------------------------------------------------------------------------|------------------------------|
| Mixed-cancer cohort  |                                            |                                                                                                                                                                                                                                                             |                                                                |                                             |                  |                          |                        |                                                                        |                                                                                                 |                                                                                                                                                                                                                                                                                                                                                                                                                                                                              |                                                                                                                                                                                                                                                         |                              |
| Garwicz S, 2012 [71] | Denmark, Finland, Iceland, Norway & Sweden | To evaluate late and very late mortality, and patterns of causes of death, in 5-year survivors after childhood and adolescent cancer in cases diagnosed during four decades in the five Nordic countries.                                                   | Nordic Childhood Cancer Cohort                                 | Any primary malignancy                      | 1960-1999        | 15-19                    | 5-years post-diagnosis | NR: Number of AYAs (15-19) in the age stratified analysis not reported | NR: 331,384 person-years. Median follow-up 13.0 years for the entire cohort starting at 5 years |                                                                                                                                                                                                                                                                                                                                                                                                                                                                              | None presented                                                                                                                                                                                                                                          | NA                           |
| Prasad P, 2012 [72]  | Finland                                    | To evaluate non-malignant mortality patterns (specifically circulatory and respiratory disease deaths) among five-year survivors of AYA cancers in a large, Finnish population-based cohort, and to compare these rates to those in the general population. | Finnish Cancer Registry linked to National population Registry | Any solid tumor or hematological malignancy | 1966-1999        | 15-34                    | 5-years post-diagnosis | 6,297                                                                  | Median 15.9 years                                                                               | SMR for all causes of death: for ages 15-19 (9.2, 95% CI 7.8-10.6) and for ages 20-34 (5.8, 95% CI 5.4-6.2). SMR for death due to circulatory disease: for diagnosis of HL, 8.4 (95% CI 3.1-18.2) for ages 15-19 and 6.5 (95% CI 4.6-8.9) for ages 20-34. For diagnosis of NHL, 21.8 (95% CI 7.1-50.8) for ages 15-19 and 3.3 (95% CI 1.4-6.5) for ages 20-34. For CNS tumor, 1.2 (95% CI 0.03-6.6; non-significant) for ages 15-19 and 3.2 (95% CI 1.3-6.5) for ages 20-34. | Type of cancer (only for mortality due to circulatory disease which reports stratified by age. Only 3 types of cancers evaluated HL, NHL, CNS. CNS not significant SMR for 15-29 but significant for 20-34); Younger age at diagnosis (15-19 vs. 20-34) | None stratified by Age       |

| Reference            | Country of origin | Purpose                                                                                                                                                                                                                                                | Data source                                                                                                                                             | Cancer type            | Diagnosis period | Age at diagnosis (years) | Survival entry date    | Number of AYA participants | Follow-up time      | Results                                                                                                                                                                                                                                                                                                                                                                                                                                                                                                                             | Statistically significant risk factors                                                                                                                                                                                                                                                                                                                                                                              | Non-significant risk factors                                |
|----------------------|-------------------|--------------------------------------------------------------------------------------------------------------------------------------------------------------------------------------------------------------------------------------------------------|---------------------------------------------------------------------------------------------------------------------------------------------------------|------------------------|------------------|--------------------------|------------------------|----------------------------|---------------------|-------------------------------------------------------------------------------------------------------------------------------------------------------------------------------------------------------------------------------------------------------------------------------------------------------------------------------------------------------------------------------------------------------------------------------------------------------------------------------------------------------------------------------------|---------------------------------------------------------------------------------------------------------------------------------------------------------------------------------------------------------------------------------------------------------------------------------------------------------------------------------------------------------------------------------------------------------------------|-------------------------------------------------------------|
| Zhang, 2012 [18]     | Canada            | To assess long-term risks of overall and cause-specific mortality and SMN among survivors of young adult cancer compared to the risk in the general British Columbian population and evaluate the effects of demographic and clinical factors on risk. | Childhood, Adolescent and Young Adult Cancer Survivors Research Program in British Columbia; identified cases from the British Columbia Cancer Registry | Any primary malignancy | 1970-1995        | 20-24                    | 5-years post-diagnosis | 1,248                      | 21,711 person-years | Highest SMR for CNS tumor survivors (SMR 23.6, 95% CI 15.1-35.1; AER 27.8); lowest SMR for germ cell tumors (SMR 2.1 95% CI, 1.0-4.0; AER 1.6). Higher SMR between 5-19 years follow-up time (SMR 27.8, 95% CI 22.5-33.8; AER 19.4) than 20+ years follow-up time (SMR 2.0, 95% CI 1.4-2.7; AER 1.2 ). Females at higher risk than males (SMR=6.3; 95% CI, 4.8–8.3; AER 3.8 vs SMR=5.6; 95% CI, 4.5–6.9; AER 7.1). Radiation therapy was associated with a 2-fold increase in risk of all-cause mortality (HR=2.0, 95% CI 1.3-3.1). | Type of primary cancer (All significant SMR but CNS highest AER than the others. Lowest AER for Germ cell tumors), chemotherapy ( No higher AER for males; but lower for females), radiation treatment (yes higher AER than no), surgery (no higher AER than yes), shorter follow-up time (5-19 higher AER than 20+), most recent diagnosis period (1990-1995 higher AER), sex (female worst for overall mortality) | No                                                          |
| Haggard F, 2013 [70] | Australia         | To estimate relative survival ratios and model excess mortality from malignancies in                                                                                                                                                                   | Western Australian Data                                                                                                                                 | Any primary malignancy | 1982-2004        | 15-39                    | At diagnosis           | 10,266                     | Median 8.2 years    | Overall 5-year relative survival rates for AYAs diagnosed with any cancer in the most recent diagnostic period (2000-2004) was 0.84 (95% CI 0.82–0.86) in males and 0.86 (95% CI                                                                                                                                                                                                                                                                                                                                                    | type of cancer, sex (typically male sex worse), era of diagnosis                                                                                                                                                                                                                                                                                                                                                    | Some not significant reported for cancer specific: Calendar |

| Reference         | Country of origin | Purpose                                                                                                                                                 | Data source             | Cancer type                                                        | Diagnosis period | Age at diagnosis (years) | Survival entry date    | Number of AYA participants | Follow-up time                                      | Results                                                                                                                                                                                                                                                                                                                                                                                                                                                                                                                                                                                                                                                                                                                                                                                                                                                                                                                                                                             | Statistically significant risk factors                                                                                                                                                                                            | Non-significant risk factors                                                                                                                                                                                                                                                          |
|-------------------|-------------------|---------------------------------------------------------------------------------------------------------------------------------------------------------|-------------------------|--------------------------------------------------------------------|------------------|--------------------------|------------------------|----------------------------|-----------------------------------------------------|-------------------------------------------------------------------------------------------------------------------------------------------------------------------------------------------------------------------------------------------------------------------------------------------------------------------------------------------------------------------------------------------------------------------------------------------------------------------------------------------------------------------------------------------------------------------------------------------------------------------------------------------------------------------------------------------------------------------------------------------------------------------------------------------------------------------------------------------------------------------------------------------------------------------------------------------------------------------------------------|-----------------------------------------------------------------------------------------------------------------------------------------------------------------------------------------------------------------------------------|---------------------------------------------------------------------------------------------------------------------------------------------------------------------------------------------------------------------------------------------------------------------------------------|
|                   |                   | AYAs, highlighting differences in outcomes according to gender, age, socio-economic status, geographic location and calendar period of diagnosis.       | Linkage System          |                                                                    |                  |                          |                        |                            |                                                     | 0.85–0.88) in females. Diagnoses of melanoma, germ cell tumors had good prognoses over 5 years (relative survival ratios=0.96 to 1.00). Diagnoses of leukemia and CNS malignancies had poorer prognoses over 5 years (SRS=0.5 to 0.6). For all AYA cancers combined, excess mortality increased with increasing age at diagnosis. Survival for all cancers combined higher for females vs. males (HR =0.66, 95% CI 0.62–0.71). Aboriginal AYAs experienced a higher excess mortality (HR=1.47, 95% CI 1.23–1.76) compared with non-Aboriginal AYAs. Increased mortality for AYAs living in rural and remote areas compared with those living in urban areas (HR=1.13, 95% CI 1.04–1.23), but the only subgroup in which this was true was for carcinomas. Increased mortality with declining SES for all cancers combined (HR, lowest vs. highest quartile: 1.14, 95% CI 1.04–1.26). Mortality was higher for older AYA cancer survivors (30-39 vs. 15-19: HR=1.4, 95% CI 1.2–1.6). | (except for CNS and soft tissue sarcoma; Ref 1985-1989), older age at diagnosis (30-39 vs 15-19), Aboriginal status ( vs non-Aboriginal), living in rural/remote area (vs Urban areas), lower SES(lowest vs highest quartile-ref) | period of diagnosis for CNS and soft-tissue sarcoma (ref 1985-1989); Sex for CNS (ref male); Aboriginal status for Leukemia, Lymphoma, CNS, Soft-tissue, and Melanoma (ref non-aboriginal); Age at diagnosis (30-39 vs 15-19 not significant for Soft tissue, germ cell, and melanoma |
| Kero A, 2014 [49] | Finland           | To investigate the cause-specific late mortality in 5-year survivors of childhood and young adulthood cancer diagnosed between 1966 and 2004 in Finland | Finnish Cancer Registry | Any primary malignancy except carcinoma in situ lesion of the skin | 1996-2004        | 20-34                    | 5-years post-diagnosis | 11,417                     | NR: 6,000 individuals had follow-up beyond 30 years | Highest SMR (all-cause mortality) for survivors of ALL (SMR =14.2, 95% CI 7.4–20.9) and CNS tumor (SMR=12.3, 95% CI 11.2–13.4).                                                                                                                                                                                                                                                                                                                                                                                                                                                                                                                                                                                                                                                                                                                                                                                                                                                     | Type of cancer for overall cause of mortality (higher SMR for CNS compared to HL and NHL)                                                                                                                                         | Type of cancer: Not significant SMR for CNS for cardiac ischemia cause of death; and NHL for                                                                                                                                                                                          |

| Reference             | Country of origin | Purpose                                                                                                                                                                      | Data source                                                                                                | Cancer type                                   | Diagnosis period | Age at diagnosis (years) | Survival entry date    | Number of AYA participants | Follow-up time           | Results                                                                                                                                                                                                                                                                                                                                                                                                                               | Statistically significant risk factors                                                                                                                                                | Non-significant risk factors                                                                                                                             |
|-----------------------|-------------------|------------------------------------------------------------------------------------------------------------------------------------------------------------------------------|------------------------------------------------------------------------------------------------------------|-----------------------------------------------|------------------|--------------------------|------------------------|----------------------------|--------------------------|---------------------------------------------------------------------------------------------------------------------------------------------------------------------------------------------------------------------------------------------------------------------------------------------------------------------------------------------------------------------------------------------------------------------------------------|---------------------------------------------------------------------------------------------------------------------------------------------------------------------------------------|----------------------------------------------------------------------------------------------------------------------------------------------------------|
|                       |                   | using national population health registries.                                                                                                                                 |                                                                                                            |                                               |                  |                          |                        |                            |                          |                                                                                                                                                                                                                                                                                                                                                                                                                                       |                                                                                                                                                                                       | respiratory cause of death.                                                                                                                              |
| Chao C, 2016 [58]     | United States     | To describe the epidemiology and risk factors for CVD in survivors of adolescent and young adult (AYA) cancer.                                                               | Kaiser Permanent e Southern California                                                                     | Any primary malignancy                        | 1998-2009        | 15-39                    | 2-years post-diagnosis | 5,673                      | Mean 4.4 years           | Higher all-cause mortality in cancer survivors who developed CVD compared to survivors without CVD (HR 10.9, 95% CI 8.1-14.8). Compared to those without CVD, survivors who developed CVD had lower 5 (0.67 with CVD vs 0.92 without CVD) and 10 years (0.55 vs. 0.90) survival after diagnosis.                                                                                                                                      | CVD (vs. without CVD)                                                                                                                                                                 | No                                                                                                                                                       |
| Henrique L, 2016 [73] | Brazil            | To identify factors associated with early mortality from cancer in adolescents and young adults in a reference institution for oncology treatment in Santa Catarina, Brazil. | The information system of hospital cancer records (Sistema de Informação de Registo Hospitalar de Câncer), | Neoplasia excluding primary tumors in the CNS | 2002-2013        | 15-29                    | At diagnosis           | 889                        | NR: "Cohort of 12 years" | Adjusting for neoplasia and sex: Higher risk of dying in individuals with non-hematological neoplasia (solid tumors) compared with individuals diagnosed with leukemias and lymphomas (HR: 1.47, 95%CI: 1.12–1.93). Adjusting for neoplasia and age: Compared with individuals diagnosed with leukemias and lymphomas, individuals diagnosed with non-hematological neoplasia had greater risk of death (HR: 1.51, 95%CI: 1.15–1.99). | male sex (vs. Female), younger age at diagnosis (15-24 vs 25-29), fewer years in school, longer time between diagnosis and treatment, non-hematological neoplasia (vs. hematological) | No                                                                                                                                                       |
| Henson K, 2016 [74]   | England & Wales   | To investigate long-term risk of cardiac mortality among 5-year survivors of TYA cancer.                                                                                     | Teenage and Young Adult Cancer Survivor Study                                                              | Any primary malignancy                        | 1971-2006        | 15-39                    | 5-years post-diagnosis | 200,945                    | Mean of 14.3 years       | 2016 survivors died of cardiac disease. The SMR for all cardiac diseases was 1.4 (95% CI 1.3-1.4). SMR decreases with age at diagnosis; highest SMR for all cardiac diseases for individuals diagnosed at 15-19 (SMR=4.2, 95% CI 3.4-5.2) and lowest for individuals diagnosed at 35-39 (SMR=1.2, 95% CI 1.1-1.3). Compared to the general                                                                                            | For all cardiac deaths: Type of first cancer HL-referent(vs. Breast, testicular, cervix, melanoma, CNS, NHL, thyroid, gastrointestinal                                                | Type of cancer: Not significant HL-ref (vs. AML). Female sex (vs. male for CNS); Younger age at diagnosis (15-19 vs. 20-24, 25-29, 30-24,35-39, for NHL, |



| Reference            | Country of origin | Purpose                                                                                                                                                                                                              | Data source | Cancer type            | Diagnosis period | Age at diagnosis (years) | Survival entry date | Number of AYA participants | Follow-up time                            | Results                                                                                                                                                                                                                                                                                                                                                                                                                                                                                                                                                                                                                                                                  | Statistically significant risk factors                                                                                                                                                                                     | Non-significant risk factors                                                                                     |
|----------------------|-------------------|----------------------------------------------------------------------------------------------------------------------------------------------------------------------------------------------------------------------|-------------|------------------------|------------------|--------------------------|---------------------|----------------------------|-------------------------------------------|--------------------------------------------------------------------------------------------------------------------------------------------------------------------------------------------------------------------------------------------------------------------------------------------------------------------------------------------------------------------------------------------------------------------------------------------------------------------------------------------------------------------------------------------------------------------------------------------------------------------------------------------------------------------------|----------------------------------------------------------------------------------------------------------------------------------------------------------------------------------------------------------------------------|------------------------------------------------------------------------------------------------------------------|
|                      |                   |                                                                                                                                                                                                                      |             |                        |                  |                          |                     |                            |                                           | population, higher SMR were observed for survivors of HL (SMR: 3.8; 95% CI, 3.5–4.2), AML (SMR: 2.7; 95% CI, 1.6–4.4), genitourinary cancers other than bladder cancer (SMR: 2.0; 95% CI, 1.6–2.5), NHL (SMR: 1.7, 95% CI, 1.5–2.1), lung cancer (SMR: 1.7; 95% CI, 1.2–2.4), leukemia other than acute myeloid (SMR: 1.6, 95% CI, 1.0–2.4), central nervous system tumor (SMR: 1.4; 95% CI, 1.1–1.6), cervical cancer (SMR:1.3; 95% CI, 1.1–1.5), and breast cancer (SMR: 1.2; 95% CI, 1.1–1.4).                                                                                                                                                                        | , soft tissue sarcoma, ovary, bladder, kidney and GU tract, head and neck, Leukemia (except ALL), bone tumor, lung) , younger age at diagnosis 15-19(vs 20-24, 25-29, 30-34, 35-39). female sex (vs. Male for HL and NHL). | CNS), decade of cancer diagnosis (1980-89, 1990-99, 2000+ vs. 15-19). Attained age (40-49, 50-59, 60+ vs. 20-39) |
| Berkman A, 2017 [75] | United States     | To assess racial differences in risks of any death and CVD death by common cancer type among Black and White survivors of childhood and AYA (diagnosed before age 34) cancers at 5, 10, and 20 years post-diagnosis. | SEER        | Any primary malignancy | 1973-2011        | 15-34                    | At diagnosis        | 135,705                    | Median 15.1 years (until all-cause death) | Among AYA cancer survivors, Blacks were more likely than Whites to die from any cause at 10 (HR 1.91, 95% CI 1.85, 1.97) and 20 years (HR 1.89, 95% CI 1.84, 1.95). Survivors of germ cell cancer (HR 2.03, 95% CI 1.66, 2.48), melanoma (HR 1.89, 95% CI 1.14, 3.14), and HL (HR 1.63, 95% CI 1.44, 1.84) had the highest risk at 20 years. Risk of death was significantly higher for Blacks than Whites for all cancers but thyroid. For CVD deaths, specifically, Black survivors of AYA leukemias (HR 1.68, 95% CI: 1.06, 2.65), NHL (HR 3.25, 95% CI 1.56, 6.77 ), thyroid (HR 14.31, 95% CI 3.44, 59.45), melanoma (HR 2.42, 95% CI 1.89, 3.10) and other cancers | Any-cause of death: Black race/ethnicity (vs White), Type of cancer Black race (vs. White, Leukemias, HL, NHL, CNS, Germ Cell, Melanoma, Other for both 10-and 20-year survival).                                          | No                                                                                                               |

| Reference             | Country of origin | Purpose                                                                                                                                                                                                                     | Data source                                                                               | Cancer type                                  | Diagnosis period     | Age at diagnosis (years) | Survival entry date    | Number of AYA participants | Follow-up time               | Results                                                                                                                                                                                                                                                                                                                                                                                                                                                                                                                                   | Statistically significant risk factors                                                                                                                                                                                                 | Non-significant risk factors                                                                                                                                                                                                               |
|-----------------------|-------------------|-----------------------------------------------------------------------------------------------------------------------------------------------------------------------------------------------------------------------------|-------------------------------------------------------------------------------------------|----------------------------------------------|----------------------|--------------------------|------------------------|----------------------------|------------------------------|-------------------------------------------------------------------------------------------------------------------------------------------------------------------------------------------------------------------------------------------------------------------------------------------------------------------------------------------------------------------------------------------------------------------------------------------------------------------------------------------------------------------------------------------|----------------------------------------------------------------------------------------------------------------------------------------------------------------------------------------------------------------------------------------|--------------------------------------------------------------------------------------------------------------------------------------------------------------------------------------------------------------------------------------------|
|                       |                   |                                                                                                                                                                                                                             |                                                                                           |                                              |                      |                          |                        |                            |                              | (HR 2.54, 95% CI 2.13, 3.05) had a higher risk at 20 years.                                                                                                                                                                                                                                                                                                                                                                                                                                                                               |                                                                                                                                                                                                                                        |                                                                                                                                                                                                                                            |
| Anderson C, 2018 [76] | United States     | To estimate 5-year relative survival for AYAs with cancer, at diagnosis and for each additional year survived (i.e. conditional five-year relative survival) up to 25 years post-diagnosis.                                 | SEER-9                                                                                    | Any primary malignancy except Kaposi sarcoma | 1973-2009            | 15-39                    | At diagnosis           | 205,954                    | NR: Analysis was for 7 years | At 7 years, relative survival of AYA cancer survivors exceeded 95% compared with the general population. Greater relative survival for patients diagnosed in 1988-2009 compared to those diagnosed 1973-1987. Survival improvements over time were noted for most cancers. There was no difference in conditional 5-, 10- or 20-year survival between males and females when all cancers were reported together, but females had somewhat better survival outcomes for most cancer sites, particularly in the years closest to diagnosis. | male sex (vs female most sites), older age at diagnosis (30-39 vs 15-29), type of cancer (CNS, female breast, HL, and Leukemia had excess mortality risk), earlier era of diagnosis (1973-1987 vs 1988-2009)                           | No. States that very little excess mortality compared to the general population observed in those surviving at least 7 years after diagnosis                                                                                               |
| Fidler M, 2018 [77]   | England & Wales   | To investigate the risk of long-term respiratory mortality among 5-year cancer survivors diagnosed before age 40 years using the British Childhood Cancer Survivor Study and Teenage and Young Adult Cancer Survivor Study. | British Childhood Cancer Survivor Study and Teenage and Young Adult Cancer Survivor Study | Any primary malignancy                       | 1971-2006 for TYACCS | 15-39                    | 5-years post-diagnosis | 200,945                    | Mean 19.3 years              | The proportion of deaths attributable to respiratory causes was highest among lung cancer survivors at 10%, followed by head and neck cancer survivors and cervical cancer survivors at 6% each. Pneumonia deaths were higher among males than females and survivors of lung cancer, CNS tumors and head and neck cancers.                                                                                                                                                                                                                | Type of cancer (Lung, Leukemia (except AML), head and neck, and CNS greatest AER of overall respiratory deaths; Lung, CNS, Head and Neck greatest AER for pneumonia, Lung for chronic lower respiratory disease), male sex (vs Female) | Not significant AER: Type of cancer (Breast, Testicular, Thyroid, Gastrointestinal, soft tissue sarcoma, Bladder, Other genitourinary, for all respiratory diseases studied ), AML (all except other respiratory illness), Ovary, Leukemia |

| Reference | Country of origin | Purpose | Data source | Cancer type | Diagnosis period | Age at diagnosis (years) | Survival entry date | Number of AYA participants | Follow-up time | Results | Statistically significant risk factors                                                                                                                                                                                                                                                                                                                                                                                                         | Non-significant risk factors                                                                                                                                                                                                                                                                                                                                                                                                                                       |
|-----------|-------------------|---------|-------------|-------------|------------------|--------------------------|---------------------|----------------------------|----------------|---------|------------------------------------------------------------------------------------------------------------------------------------------------------------------------------------------------------------------------------------------------------------------------------------------------------------------------------------------------------------------------------------------------------------------------------------------------|--------------------------------------------------------------------------------------------------------------------------------------------------------------------------------------------------------------------------------------------------------------------------------------------------------------------------------------------------------------------------------------------------------------------------------------------------------------------|
|           |                   |         |             |             |                  |                          |                     |                            |                |         | greater AER for overall respiratory deaths, and pneumonia, Female sex (vs Male) greater AER for fibrosis, higher attained age 60+ (vs 20-29) for overall, Chronic lower respiratory disease, for pneumonia and pneumonitis, early treatment era <1970 (vs 1990-2006) for pneumonia and chronic lower respiratory death; older age at diagnosis (Higher AER as age at diagnosis increased) for pneumonia, and Chronic lower respiratory disease | (except AML), other, bone tumor, melanoma (all except pneumonia), Cervical (all except pneumonia and chronic lower respiratory disease), CNS (Chronic respiratory disease and fibrosis) NHL (Chronic lower respiratory disease, Fibrosis and pneumonitis), head and neck (fibrosis and other respiratory disease), HL (pneumonitis)); Age at diagnosis ( 15-19 (for pneumonitis), 25-29 (all except pneumonia and other respiratory illness), 30-34 (chronic lower |

| Reference | Country of origin | Purpose | Data source | Cancer type | Diagnosis period | Age at diagnosis (years) | Survival entry date | Number of AYA participants | Follow-up time | Results | Statistically significant risk factors | Non-significant risk factors                                                                                                                                                                                                                                                                                                                                                                                                                  |
|-----------|-------------------|---------|-------------|-------------|------------------|--------------------------|---------------------|----------------------------|----------------|---------|----------------------------------------|-----------------------------------------------------------------------------------------------------------------------------------------------------------------------------------------------------------------------------------------------------------------------------------------------------------------------------------------------------------------------------------------------------------------------------------------------|
|           |                   |         |             |             |                  |                          |                     |                            |                |         |                                        | respiratory disease and pneumonitis), 35-39 (Fibrosis and pneumonitis)); Treatment Era 1970-1979 (Fibrosis and other respiratory illness), 1980-1989 (Pneumonitis), 1990-1999 (chronic lower respiratory disease and pneumonitis), 2000-2006 (all except pneumonia and other respiratory illness); Attained age 20-29 (all except pneumonia and other respiratory illness), 50-59 (pneumonitis), 60+ (Fibrosis and other respiratory illness) |

| Reference           | Country of origin | Purpose                                                                                                                                                                   | Data source                                                  | Cancer type                                                                                                                                                                                                          | Diagnosis period | Age at diagnosis (years) | Survival entry date    | Number of AYA participants | Follow-up time            | Results                                                                                                                                                                                                           | Statistically significant risk factors                                                                 | Non-significant risk factors |
|---------------------|-------------------|---------------------------------------------------------------------------------------------------------------------------------------------------------------------------|--------------------------------------------------------------|----------------------------------------------------------------------------------------------------------------------------------------------------------------------------------------------------------------------|------------------|--------------------------|------------------------|----------------------------|---------------------------|-------------------------------------------------------------------------------------------------------------------------------------------------------------------------------------------------------------------|--------------------------------------------------------------------------------------------------------|------------------------------|
| Hayek S, 2018 [23]  | Israel            | To estimate the risk of second primary neoplasm and long-term mortality among 5+year childhood cancer survivors relative to their counterparts in the general population. | Israel National Cancer Registry                              | Any primary malignancy                                                                                                                                                                                               | 1980-2007        | 15-19                    | 5-years post-diagnosis | 1,765                      | Age-specific follow-up NR |                                                                                                                                                                                                                   | None presented                                                                                         | NA                           |
| Keegan T, 2018 [46] | United States     | To examine associations of SES characteristics with CVD after consideration for clinical factors among 2-year survivors of 14 common AYA cancers.                         | California Cancer Registry and State hospital discharge data | 14 First primary AYA cancers: female breast carcinoma, melanoma, thyroid carcinoma, testicular cancer, HL, NHL, soft tissue sarcoma, bone sarcoma, colorectal cancer, CNS cancer, cervical cancer and ovarian cancer | 1996-2012        | 15-39                    | 2-years post-diagnosis | 79,176                     | Median 9 years            | There was an 8-fold or higher increased risk of death among AYAs who developed CVD compared to those who did not. HR was as high as 37 (95% CI 28.2-48.6) for melanoma and as low as 8 (95% CI 6.0-10.7) for NHL. | Type of cancer (Melanoma Highest among those who developed CVD), Developed CVD (vs. not developed CVD) | No                           |

| Reference             | Country of origin | Purpose                                                                                                                                                              | Data source | Cancer type                                  | Diagnosis period | Age at diagnosis (years) | Survival entry date | Number of AYA participants | Follow-up time                                   | Results                                                                                                                                                                                                                                                                                                                                                                                                                                                                                                                                                                                                                                                                                                                                                                                          | Statistically significant risk factors                                                                                                                                                                                                                                                                                                                                                                                                                                                                                     | Non-significant risk factors                                                                                                                                                                                                                                                                                                         |
|-----------------------|-------------------|----------------------------------------------------------------------------------------------------------------------------------------------------------------------|-------------|----------------------------------------------|------------------|--------------------------|---------------------|----------------------------|--------------------------------------------------|--------------------------------------------------------------------------------------------------------------------------------------------------------------------------------------------------------------------------------------------------------------------------------------------------------------------------------------------------------------------------------------------------------------------------------------------------------------------------------------------------------------------------------------------------------------------------------------------------------------------------------------------------------------------------------------------------------------------------------------------------------------------------------------------------|----------------------------------------------------------------------------------------------------------------------------------------------------------------------------------------------------------------------------------------------------------------------------------------------------------------------------------------------------------------------------------------------------------------------------------------------------------------------------------------------------------------------------|--------------------------------------------------------------------------------------------------------------------------------------------------------------------------------------------------------------------------------------------------------------------------------------------------------------------------------------|
| Anderson C, 2019 [78] | United States     | To examine risk of mortality from non-cancer causes after an AYA cancer diagnosis and investigate disparities according to race/ethnicity and other characteristics. | SEER        | Any primary malignancy except Kaposi sarcoma | 1987-2015        | 15-39                    | At diagnosis        | 401,287                    | Median 7.1 years for women and 6.1 years for men | The 10-year cumulative incidence of noncancer-related death after AYA cancer was 2% and 5% among women and men, respectively. With adjustment for cancer type, all noncancer mortality was increased among non-Hispanic Black AYAs (vs. non-Hispanic White: HRWomen = 2.31 (95% CI: 2.16–2.47); HRMen = 2.17 (95% CI: 2.05–2.30)) and those in the South (HR vs. Northeast: HRWomen = 1.18 (95% CI: 1.07–1.29); HRMen = 1.42(95% CI: 1.31–1.55)) or in rural counties (HR vs. metro: HRWomen = 1.74 (95% CI: 1.47–2.07); HRMen = 1.57 (95% CI: 1.33–1.86)). Mortality from CVD and infectious disease was also elevated among non-Hispanic Black AYAs. Compared to the lowest quintile of poverty, persons with the most poverty had a higher risk for noncancer death HR=1.4, 95% CI 1.3, 1.5). | All noncancer Deaths: non-Hispanic Black, Hispanic (vs Non-Hispanic White) for males and non-Hispanic Black (vs Non-White) for females, living in West, South, and Midwest US (vs Northeast) for male, living in South US (vs Northeast) for females. living in a rural county (vs Metro) for males, living in a rural, urban area (vs Metro) for females, % of persons below poverty level quartiles Q2, Q3, Q4 (vs Q1) for both males and females, % Persons with < HS education quartiles Q3 & Q4 (vs Q1) for males and | All noncancer deaths: Other non-Hispanic (vs Non-Hispanic White) for males and Hispanic, Other non-Hispanic (vs Non-Hispanic White) for females, living in West, Midwest US (vs Northeast) for females, living in Urban setting (vs Metro) for males, % Persons with < HS education quartiles Q2 (vs Q1) for both males and females. |

| Reference             | Country of origin | Purpose                                                                                                                                                                               | Data source                                                                       | Cancer type                                                                                                                               | Diagnosis period | Age at diagnosis (years) | Survival entry date    | Number of AYA participants | Follow-up time                                            | Results                                                                                                                                                      | Statistically significant risk factors                                                                                                   | Non-significant risk factors |
|-----------------------|-------------------|---------------------------------------------------------------------------------------------------------------------------------------------------------------------------------------|-----------------------------------------------------------------------------------|-------------------------------------------------------------------------------------------------------------------------------------------|------------------|--------------------------|------------------------|----------------------------|-----------------------------------------------------------|--------------------------------------------------------------------------------------------------------------------------------------------------------------|------------------------------------------------------------------------------------------------------------------------------------------|------------------------------|
|                       |                   |                                                                                                                                                                                       |                                                                                   |                                                                                                                                           |                  |                          |                        |                            |                                                           |                                                                                                                                                              | females, type of cancer (Highest for NHL, leukemia, HL, head and neck, colorectal among males; and NHL, Leukemia and CNS among females). |                              |
| Bagnasco F, 2019 [79] | Italy             | To evaluate overall and cause-specific mortality in a large cohort of Italian childhood cancer survivors and adolescent cancer survivors identified through the off-therapy registry. | Off-therapy registry of the Associazione Italiana Ematologia Oncologia Pediatrica | 1960-185: ALL, ANLL, Wilms tumor, HL, NHL, and neuroblastoma. 1986 to 1989 added Soft-tissue Sarcomas and CNS. All tumor types since 1989 | 1960-1999        | 15-21                    | 5-years post-diagnosis | 753                        | Median 22 years post-diagnosis (for censored individuals) |                                                                                                                                                              | None presented                                                                                                                           | NA                           |
| Chao C, 2019 [25]     | United States     | To provide a comprehensive assessment of SMN risk in survivors of AYA cancer using study methods that minimized confounding to inform survivorship care planning for                  | SEER                                                                              | Any primary malignancy                                                                                                                    | 1990-2012        | 15-39                    | 2 years post-diagnosis | 10,574                     | Median 7.7 years                                          | AYA cancer survivors with SMN were at 7-fold increased risk of dying compared with survivors who did not develop SMN (adjusted HR, 7.17, 95% CI, 6.06-8.49). | development of SMN (vs Not developing SMN)                                                                                               | No                           |

| Reference             | Country of origin | Purpose                                                                                                                                                              | Data source                                     | Cancer type            | Diagnosis period | Age at diagnosis (years) | Survival entry date    | Number of AYA participants | Follow-up time    | Results                                                                                                                                                                                                                                                  | Statistically significant risk factors                                                                                                                                                                                                                                                                                                                  | Non-significant risk factors                                                                                                                                                                                                                                               |
|-----------------------|-------------------|----------------------------------------------------------------------------------------------------------------------------------------------------------------------|-------------------------------------------------|------------------------|------------------|--------------------------|------------------------|----------------------------|-------------------|----------------------------------------------------------------------------------------------------------------------------------------------------------------------------------------------------------------------------------------------------------|---------------------------------------------------------------------------------------------------------------------------------------------------------------------------------------------------------------------------------------------------------------------------------------------------------------------------------------------------------|----------------------------------------------------------------------------------------------------------------------------------------------------------------------------------------------------------------------------------------------------------------------------|
|                       |                   | survivors of AYA cancer.                                                                                                                                             |                                                 |                        |                  |                          |                        |                            |                   |                                                                                                                                                                                                                                                          |                                                                                                                                                                                                                                                                                                                                                         |                                                                                                                                                                                                                                                                            |
| Moke D, 2019 [80]     | United States     | To gain a more contemporary understanding of trends and disparities of site-specific AYA survival.                                                                   | California Cancer Registry                      | Any primary malignancy | 1988-2014        | 15-39                    | At diagnosis           | 225,493                    | NR                | The 7 and 10-year overall survival probability was higher among those diagnosed in 2001-2017 compared to 1988-2000 (78.1% vs 66.7%) and (75.3%vs 64.4%), respectively.                                                                                   | Period of diagnosis (1988-2000 worse than 2001-2014)                                                                                                                                                                                                                                                                                                    | No                                                                                                                                                                                                                                                                         |
| Armenian S, 2020 [81] | United States     | To examine cause-specific mortality in 2-year survivors of AYA cancers matched to individuals without cancer to determine whether mortality rates changed over time. | Kaiser Permanent e Southern California and SEER | Any primary malignancy | 1990-2012        | 15-39                    | 2-years post-diagnosis | 10,574                     | Median 10.1 years | Lowest long-term survival in breast cancer survivors (25 years: 59.8%) and the highest long-term survival in thyroid cancer survivors (25 years: 95.3%). Radiation therapy was associated with a higher risk of death from SMN (HR=1.5, 95% CI 1.0-2.1). | Overall Mortality: female sex (vs males) Younger age at diagnosis 15-19, Cancer type (Highest for Breast Cancer Survivors). Among cancer survivors SMS and Health-related deaths: Age at diagnosis 20-29, 30-39 (vs 15-19) for death from other health-related, female sex (vs male) for death from SMN, Asian/Pacific Islander (vs Non-Hispanic White- | Among Cancer Survivors: 20-29, 30-39 (vs 15-19) for death from SMN, Race/ethnicity (Hispanic, Asian/Pacific Islander, Non-Hispanic Black (vs. Non-Hispanic White) for SMN deaths, Asian/Pacific Islander, Hispanic (vs Non-Hispanic White) for other health-related deaths |



| Reference              | Country of origin | Purpose                                                                                                         | Data source                                       | Cancer type                                                 | Diagnosis period | Age at diagnosis (years) | Survival entry date    | Number of AYA participants | Follow-up time | Results                                                                                                                                                                                                                                                                     | Statistically significant risk factors                                                                                                                                                                                                                                                                                                                                                      | Non-significant risk factors                                                                     |
|------------------------|-------------------|-----------------------------------------------------------------------------------------------------------------|---------------------------------------------------|-------------------------------------------------------------|------------------|--------------------------|------------------------|----------------------------|----------------|-----------------------------------------------------------------------------------------------------------------------------------------------------------------------------------------------------------------------------------------------------------------------------|---------------------------------------------------------------------------------------------------------------------------------------------------------------------------------------------------------------------------------------------------------------------------------------------------------------------------------------------------------------------------------------------|--------------------------------------------------------------------------------------------------|
|                        |                   |                                                                                                                 |                                                   |                                                             |                  |                          |                        |                            |                |                                                                                                                                                                                                                                                                             | Asian/pacific Islander at lower Risk) for death from SMN (HR=0.23, 95% CI 0.07-0.73) and non-Hispanic Black (vs Non-Hispanic White) for death from other health-related causes (HR=1.74, 95% CI 1.08-2.80), cancer stage at diagnosis not applicable, II, III/IV (vs Stage I) for both SMN and health-related deaths, radiation yes (vs No) for death from SMN (HR=1.45, 95% CI 1.03-2.06). |                                                                                                  |
| Cuglievan B, 2020 [82] | United States     | To determine association between lag time to diagnosis, health insurance type and income status with AYA cancer | The University of Texas MD Anderson Cancer Centre | Brain tumor, HL, Leukemia, non-HL, thyroid cancer, sarcomas | 2001-2003        | 15-29                    | 5-years post-diagnosis | 201                        | NR             | Late overall survival probability at 15 years post-diagnosis was higher for those with private insurance than those with public insurance (89%, 95%CI: 80%-94% vs 62%, 95%CI: 36%-80% respectively). The trend was observed among patients with brain tumors, leukemia, and | Public health insurance (vs. private); Household income (<=50,000). Poorest long-term overall                                                                                                                                                                                                                                                                                               | Age (15-19, 20-24, 25-29), Sex (male, Female), race/ethnicity (African American, Asian American, |

| Reference               | Country of origin      | Purpose                                                                                                                          | Data source                         | Cancer type                                                                                         | Diagnosis period | Age at diagnosis (years) | Survival entry date    | Number of AYA participants | Follow-up time    | Results                                                                                                                                                                                                                                                                                                                                                                                                                                                                                                                                                 | Statistically significant risk factors                                                                                                                                                                          | Non-significant risk factors  |
|-------------------------|------------------------|----------------------------------------------------------------------------------------------------------------------------------|-------------------------------------|-----------------------------------------------------------------------------------------------------|------------------|--------------------------|------------------------|----------------------------|-------------------|---------------------------------------------------------------------------------------------------------------------------------------------------------------------------------------------------------------------------------------------------------------------------------------------------------------------------------------------------------------------------------------------------------------------------------------------------------------------------------------------------------------------------------------------------------|-----------------------------------------------------------------------------------------------------------------------------------------------------------------------------------------------------------------|-------------------------------|
|                         |                        | patients' long-term survival.                                                                                                    |                                     | (bone or soft-tissue)                                                                               |                  |                          |                        |                            |                   | thyroid cancer. Significantly higher long overall survival also found for AYA residing in high-income neighborhoods that those in low-income neighborhoods.                                                                                                                                                                                                                                                                                                                                                                                             | survival for combination of public insurance and low income (<=50,000) at diagnosis                                                                                                                             | Hispanic, Non-Hispanic White) |
| Suh E, 2020 [42]        | United States & Canada | To describe chronic health conditions and all-cause and specific mortality among survivors of early-adolescent and YA cancer.    | Childhood Cancer Survivorship Study | Leukemia, CNS malignancy, HL, NHL, Wilms tumor, neuroblastoma, soft-tissue sarcoma, and bone cancer | 1970-1999        | 15-20                    | 5-years post-diagnosis | 5,804                      | Median 20.6 years | SMR varied by cancer diagnosis, with the highest being for CNS (SMR=7.8, 95% CI 6.6-9.2) and the lowest being for NHL (SMR=3.8, 95% CI 3.1-4.7).                                                                                                                                                                                                                                                                                                                                                                                                        | Type of cancer (HL and CNS Highest SMRs)                                                                                                                                                                        | No                            |
| Lymphoma cohort         |                        |                                                                                                                                  |                                     |                                                                                                     |                  |                          |                        |                            |                   |                                                                                                                                                                                                                                                                                                                                                                                                                                                                                                                                                         |                                                                                                                                                                                                                 |                               |
| Anton-Culver, 2010 [83] | United States          | To examine whether socioeconomic factors other than race/ethnicity and treatment differences influence survival in AYA with NHL. | California Cancer Registry          | NHL                                                                                                 | 1996-2005        | 15-39                    | At diagnosis           | 3,489                      | NR                | The adjusted HR for all-cause mortality increased by 2% by year increase of age at diagnosis was 1.02 (1.01-1.03). Females had lower overall mortality than males (HR=0.65, 95% CI 0.57-0.75). The unadjusted overall survival at 100 months since diagnosis by neighborhood socio-economic status (SES) was approximately 73.7% among AYA living in Highest SES, 68.3% for High n SES, 67.8% for Middle SES, 57.5% for Low SES and 52.8% among those in the Lowest SES. Adjusted HR for all-cause mortality among people who did not have chemotherapy | Sex male, increasing age at diagnosis, stage (distant and regional worst compared to local); Nodality (extranodal worst compared to nodal), Not receiving chemotherapy as first line of treatment, neighborhood |                               |

| Reference             | Country of origin | Purpose                                                                     | Data source                     | Cancer type | Diagnosis period | Age at diagnosis (years) | Survival entry date     | Number of AYA participants | Follow-up time                                                           | Results                                                                                                                                                                                                                                                                                                                                                                                   | Statistically significant risk factors                                                                                                                                                                                                                        | Non-significant risk factors                                                        |
|-----------------------|-------------------|-----------------------------------------------------------------------------|---------------------------------|-------------|------------------|--------------------------|-------------------------|----------------------------|--------------------------------------------------------------------------|-------------------------------------------------------------------------------------------------------------------------------------------------------------------------------------------------------------------------------------------------------------------------------------------------------------------------------------------------------------------------------------------|---------------------------------------------------------------------------------------------------------------------------------------------------------------------------------------------------------------------------------------------------------------|-------------------------------------------------------------------------------------|
|                       |                   |                                                                             |                                 |             |                  |                          |                         |                            |                                                                          | was 1.27 (1.02-1.57) compared to people who did, while lymphoma-specific mortality was 0.37 (0.24-0.57).                                                                                                                                                                                                                                                                                  | socio-economic status (low vs. high)                                                                                                                                                                                                                          |                                                                                     |
| Castellino, 2011 [84] | United States     | To identify factors affecting mortality risk in HL survivors.               | Childhood Cancer Survivor Study | HL          | 1970-1986        | 15-21                    | 5-years post-diagnosis  | 1,273                      | Median 23.8 and 16.1 years for participants alive and dead, respectively |                                                                                                                                                                                                                                                                                                                                                                                           | None presented                                                                                                                                                                                                                                                | NA                                                                                  |
| Xavier A, 2015 [31]   | United States     | To analyze SMN and survival outcomes of AYAs with early stage classical HL. | SEER                            | HL          | 1995-2010        | 15-39                    | 6-months post-diagnosis | 5,156                      | Median 97 months                                                         | 5-year survival was better among patients treated with RT relative to those who were not (96.1% vs. 94.6%, respectively, p=0.002). In multivariable analysis, patients had a 34% higher risk of death if not treated with RT. Hispanics (HR=1.5, 95% CI 1.1-2.0) and non-Hispanic Blacks (HR=2.3, 95% CI 1.7-3.2) experienced an increased risk of death compared to non-Hispanic Whites. | Radiation therapy omission (vs. Use of RT), earlier era of diagnosis (1995-2002 vs. 2003-2010), male sex (vs. female), race/ethnicity (Hispanic, non-Hispanic Black vs. non-Hispanic White), histological subtype (Lymphocyte-depleted vs. Nodular sclerosis) | Histology (Classical NOS, Mixed cellularity, Lymphocyte-rich vs. Nodular sclerosis) |
| Hossain J, 2015 [85]  | United States     | To examine sex disparities in male                                          | SEER                            | AML         | 1973-2012        | 15-24                    | At diagnosis            | 2,290                      | NR: Median survival time was 92 and 93                                   | The risk of mortality was 30% greater for males compared to females in the 20-24 age group (HR 1.30, 95% CI 1.12-1.52). There was                                                                                                                                                                                                                                                         | Male sex (vs Female), for                                                                                                                                                                                                                                     | Sex for patients 15-19 years of age                                                 |

| Reference            | Country of origin | Purpose                                                                                                                              | Data source                                                                                                                                                      | Cancer type                                                  | Diagnosis period | Age at diagnosis (years) | Survival entry date    | Number of AYA participants | Follow-up time                             | Results                                                                                                                                                                                                                                                                                                                                                                                                                                                                             | Statistically significant risk factors                                                                                                                                                          | Non-significant risk factors                                                                                                                                                |
|----------------------|-------------------|--------------------------------------------------------------------------------------------------------------------------------------|------------------------------------------------------------------------------------------------------------------------------------------------------------------|--------------------------------------------------------------|------------------|--------------------------|------------------------|----------------------------|--------------------------------------------|-------------------------------------------------------------------------------------------------------------------------------------------------------------------------------------------------------------------------------------------------------------------------------------------------------------------------------------------------------------------------------------------------------------------------------------------------------------------------------------|-------------------------------------------------------------------------------------------------------------------------------------------------------------------------------------------------|-----------------------------------------------------------------------------------------------------------------------------------------------------------------------------|
|                      |                   | versus female AML patients aged 0-24.                                                                                                |                                                                                                                                                                  |                                                              |                  |                          |                        |                            | months for females and males, respectively | no statistically significant difference in survival in males vs. females in the 15-19 age group.                                                                                                                                                                                                                                                                                                                                                                                    | patients in their early 20s.                                                                                                                                                                    |                                                                                                                                                                             |
| Bhuller K, 2016 [32] | Canada            | To highlight specific long-term morbidity and mortality issues for TYA patients with HL.                                             | Childhood, Adolescent and Young Adult Cancer Survivors (CAYACS) Research Program in British Columbia; cases identified from the British Columbia Cancer Registry | First primary malignancy : HL. SMN: Any secondary malignancy | 1970-1999        | 15-24                    | 5-years post-diagnosis | 442                        | Median 19.6 years from diagnosis           | During the 1970-1979 treatment era, SMR for all-cause mortality was 11.3 (95% CI 8.2-15.2; AER 13.4) compared to 4.9 (95% CI 2.5-8.8; AER 3.3) and 7.2 (95% CI 2.3-16.9; AER 3.9) for the 1980-1990 and 1990-1999 treatment eras. By far, the most unexpected deaths occurred within 5-9 years of diagnosis (SMR 248.9, 95% CI 159.5-370.3; AER 191.1).                                                                                                                             | Treatment era (SMR for 1970-1979 higher than for 1980-1989), time since diagnosis (SMR for 5-9 years higher than all others 10+)                                                                | Sex (female vs. male), Chemotherapy (yes vs. no), Radiation therapy (yes vs. no), Surgery (yes vs. no)                                                                      |
| Keegan T, 2016 [86]  | United States     | To evaluate the effect of socio-demographic characteristics, treatment and subsequent cancers on survival in AYAs diagnosed with HL. | California Cancer Registry                                                                                                                                       | HL                                                           | 1988-2011        | 15-39                    | At diagnosis           | 9,353                      | Mean 11 years                              | Among patients diagnosed with Stage I or II HL, the survival probability at 10- and 20-years were both 97% for radiation-therapy only, both 96% for "unknown" therapy, 95% and 93% for combined-modality therapy, and 93% and 91% for chemotherapy only. Among patients diagnosed with Stage III or IV HL, the survival probability at 10- and 20-years were 95% and 87% for radiation-therapy only, both 92% for "unknown" therapy, 89% and 88% for combined-modality therapy, and | Overall survival: Male (vs female), Age at diagnosis 35-39 (vs. 15-19), Early year of diagnosis 1982-1992 (vs. 2007-2011), Black and Hispanic race (vs. Non-Hispanic White), lower SES ( lowest | Overall survival: Marital status at diagnosis (not married vs Married), Asian/Pacific Islander (vs. Non-Hispanic White), histologic subtype - Mixed cellularity, Lymphocyte |

| Reference           | Country of origin | Purpose                                                                                                      | Data source                                                                                                          | Cancer type | Diagnosis period | Age at diagnosis (years) | Survival entry date    | Number of AYA participants | Follow-up time    | Results                                                                                                                                                                                                                                                                                                                                                                                   | Statistically significant risk factors                                                                                                                                                                                               | Non-significant risk factors                                                                                                               |
|---------------------|-------------------|--------------------------------------------------------------------------------------------------------------|----------------------------------------------------------------------------------------------------------------------|-------------|------------------|--------------------------|------------------------|----------------------------|-------------------|-------------------------------------------------------------------------------------------------------------------------------------------------------------------------------------------------------------------------------------------------------------------------------------------------------------------------------------------------------------------------------------------|--------------------------------------------------------------------------------------------------------------------------------------------------------------------------------------------------------------------------------------|--------------------------------------------------------------------------------------------------------------------------------------------|
|                     |                   |                                                                                                              |                                                                                                                      |             |                  |                          |                        |                            |                   | 86% and 84% for chemotherapy only. Compared to NH-Whites, overall survival was decreased among Blacks (HR=1.40, 95% CI 1.14-1.71) and Hispanics (HR=1.16, 95% CI=1.00-1.34), and HL-specific survival was decreased among Blacks (HR=1.62, 95% CI 1.24-2.11) and Hispanics (HR=1.35, 95% CI 1.12-1.64). Males experienced worst overall survivals than females (HR=1.3, 95% CI 1.2, 1.5). | quintile vs highest quintile), public or no insurance (vs Private/military), No otherwise specified histologic subtype (vs Nodular sclerosis)                                                                                        | depletion, Lymphocyte rich (vs Nodular sclerosis), Urbanization level non-metropolitan, unknown (vs Metropolitan)                          |
| Keegan T, 2018 [67] | United States     | To determine associations between sociodemographic factors and medical conditions among 2-year HL survivors. | California Cancer Registry and hospital data from the California Office of Statewide Health Planning and Development | HL          | 1996-2012        | 15-39                    | 2-years post-diagnosis | 5,085                      | Median 9.5 years  | All medical conditions examined in this study reduced overall and HL-specific survival. Respiratory conditions reduced overall survival the most of any condition (HR 6.17, 95% CI 4.5, 8.5).                                                                                                                                                                                             | Medical condition<br>Circulatory System Diseases (vs No), Respiratory system diseases (vs No), Chronic kidney disease/renal failure (vs No), Liver disease (vs No) Endocrine and related diseases (vs No) Subsequent cancers (vs No) | Medical condition<br>Hypothyroidism (vs No) for both overall and HL-specific survival; Subsequent cancers (vs No) for HL-Specific Survival |
| Patel C, 2018 [87]  | United States     | To determine late-effects of treatment in overall and HL-mortality in patients with early-stage HL           | Multi-institutional database                                                                                         | HL          | 1968-2007        | 21-30                    | At diagnosis           | 511                        | Median 15.2 years |                                                                                                                                                                                                                                                                                                                                                                                           | None presented                                                                                                                                                                                                                       | NA                                                                                                                                         |

| Reference          | Country of origin                                                                                                                                                                                                                                                                 | Purpose                                                                                                                                                                                                                                        | Data source                                                   | Cancer type              | Diagnosis period | Age at diagnosis (years) | Survival entry date               | Number of AYA participants | Follow-up time                                                                 | Results                                                                                                                                                                                        | Statistically significant risk factors | Non-significant risk factors |
|--------------------|-----------------------------------------------------------------------------------------------------------------------------------------------------------------------------------------------------------------------------------------------------------------------------------|------------------------------------------------------------------------------------------------------------------------------------------------------------------------------------------------------------------------------------------------|---------------------------------------------------------------|--------------------------|------------------|--------------------------|-----------------------------------|----------------------------|--------------------------------------------------------------------------------|------------------------------------------------------------------------------------------------------------------------------------------------------------------------------------------------|----------------------------------------|------------------------------|
|                    |                                                                                                                                                                                                                                                                                   | after radiation therapy.                                                                                                                                                                                                                       |                                                               |                          |                  |                          |                                   |                            |                                                                                |                                                                                                                                                                                                |                                        |                              |
| Leukemia cohort    |                                                                                                                                                                                                                                                                                   |                                                                                                                                                                                                                                                |                                                               |                          |                  |                          |                                   |                            |                                                                                |                                                                                                                                                                                                |                                        |                              |
| Goldman, 2010 [88] | United States, Australia, Brazil, Canada, England, France, Germany, Argentina, Austria, Belgium, Czechoslovakia, China, Denmark, Egypt, Finland, Hong Kong, Hungary, India, Iran, Ireland, Italy, Japan, Korea, Malaysia, Mexico, the Netherlands, New Zealand, Poland, Portugal, | To understand the risk of allogeneic HCT transplantation in chronic myeloid leukemia in first chronic phase who survive in continuous remission for 5 years after transplantation, and to compare mortality rates with the general population. | Center for International Blood and Marrow Transplant Research | Chronic myeloid leukemia | 1978-1998        | 20-39                    | 5-years after HCT transplantation | 1,373                      | Median follow-up 12 years from diagnosis and 11 years from HCT transplantation | The relative risk of death, treatment failure, or both among those 20-29 and 30-39 years of age at transplantation does not differ from those of patients age <20 years at HCT transplantation | None presented                         | NA                           |

| Reference           | Country of origin                                                                                     | Purpose                                                                                                                                                                                                      | Data source             | Cancer type                  | Diagnosis period             | Age at diagnosis (years) | Survival entry date   | Number of AYA participants | Follow-up time       | Results                                                                                                                                                                                                        | Statistically significant risk factors                                           | Non-significant risk factors |
|---------------------|-------------------------------------------------------------------------------------------------------|--------------------------------------------------------------------------------------------------------------------------------------------------------------------------------------------------------------|-------------------------|------------------------------|------------------------------|--------------------------|-----------------------|----------------------------|----------------------|----------------------------------------------------------------------------------------------------------------------------------------------------------------------------------------------------------------|----------------------------------------------------------------------------------|------------------------------|
|                     | Russia, Saudi Arabia, Scotland, South Africa, Spain, Sweden, Switzerland, Taiwan, Turkey, and Uruguay |                                                                                                                                                                                                              |                         |                              |                              |                          |                       |                            |                      |                                                                                                                                                                                                                |                                                                                  |                              |
| Chen Y, 2012 [89]   | United States                                                                                         | To determine incidence and relative survival of acute promyelocytic leukemia (APL) during a 34-year period.                                                                                                  | SEER                    | Acute promyelocytic leukemia | 1975-2008                    | 20-39                    | At diagnosis          | 372                        | NR                   | Ten-year relative survival (RS) was 0.24 (95%CI 0.16–0.33) for the 1975-1990 period, and 0.60 (95%CI 0.50–0.68) for the 1991-1999 period. Ten-year RS for the most recent period (2000-2008) was not reported. | None presented                                                                   | NA                           |
| Hunger S, 2012 [90] | United States                                                                                         | To examine population-based improvements in survival and the impact of clinical covariates on outcome among children and adolescents with ALL (ALL) enrolled onto COG clinical trials between 1990 and 2005. | COG ALL clinical trials | ALL                          | Enrollment period: 1990-2005 | 15-22                    | At time of enrollment | 1,515                      | Median 8.02 years    | 8% of adolescent ALL survivors in the cohort died between 5-9.99 years after the start of the study. <1 % died at 10+ years.                                                                                   | Enrollment era (lower survival probability for 1990-1994 compared to 1995-2005 ) | None stratified by age       |
| Canner J, 2013 [91] | United States                                                                                         | To examine the outcomes of AYA patients aged 16-20                                                                                                                                                           | Children's Cancer       | AML                          | 1989-2006                    | 16-20                    | At diagnosis          | 238                        | NR: At least 5 years | Overall survival for AYAs eight years after study entry was approximately 48%, compared to                                                                                                                     | None presented                                                                   | NA                           |

| Reference            | Country of origin | Purpose                                                                                                                                                                      | Data source                                                          | Cancer type              | Diagnosis period | Age at diagnosis (years) | Survival entry date | Number of AYA participants | Follow-up time                                | Results                                                                                                                                                                                                                                                                                                                                                                                                | Statistically significant risk factors                                                                                   | Non-significant risk factors                        |
|----------------------|-------------------|------------------------------------------------------------------------------------------------------------------------------------------------------------------------------|----------------------------------------------------------------------|--------------------------|------------------|--------------------------|---------------------|----------------------------|-----------------------------------------------|--------------------------------------------------------------------------------------------------------------------------------------------------------------------------------------------------------------------------------------------------------------------------------------------------------------------------------------------------------------------------------------------------------|--------------------------------------------------------------------------------------------------------------------------|-----------------------------------------------------|
|                      |                   | relative to younger patients based on data from four consecutive COG trials.                                                                                                 | Group and COG                                                        |                          |                  |                          |                     |                            |                                               | approximately 58% for younger patients (< 16 years old).                                                                                                                                                                                                                                                                                                                                               |                                                                                                                          |                                                     |
| Woods W, 2014 [92]   | United States     | To determine if differences in pediatric versus adult oncology treatments affect outcomes among AYAs with AML.                                                               | COG, Cancer and Leukemia Group B and Southwest Oncology Group trials | AML                      | 1986-2008        | 16-21                    | At diagnosis        | 517                        | NR                                            | Ten-year overall survival was 45.6% and 34% among the COG and CALG/SWOG cohorts, respectively. Ten-year overall survival was higher for patients aged 16-18 compared to aged 19-21 (43% vs. 32%, p=0.034).                                                                                                                                                                                             | Age (older age at diagnosis 19-21 vs 18-18); Trial era (before 1996 worst than after 1996)                               | No                                                  |
| Wolfson J, 2018 [93] | United States     | To evaluate the contribution of treatment site to outcome disparities experienced by AYA cancer survivors.                                                                   | Los Angeles County Cancer Surveillance Program                       | ALL, AML                 | 1998-2008        | 15-39                    | At diagnosis        | 761                        | NR                                            | Seven year survival probability for 15-39 year old ALL survivors were approximately 38% and 56% for patients treated at non-CCC/COG (other) and CCC/COG (Comprehensive Cancer Centers/COG) facilities, respectively. Seven year survival probability for 15-39 year old AML survivors were approximately 48% and 49% for patients treated at non-CCC/COG (other) and CCC/COG facilities, respectively. | tumor type, Treatment facility CCC/COG (vs Non-CCC/COG) for ALL patients, Older age at diagnosis(22-39) for ALL patients | Treatment facility CCC/COG (vs Non-CCC/COG) for AML |
| Zheng C, 2018 [94]   | China             | To analyze the outcomes of chronic myeloid leukemia in AYA patients receiving unrelated cord blood transplantation compared with those patients receiving sibling allogeneic | Data from Anhui Provincial Hospital                                  | Chronic myeloid leukemia | 2002-2015        | 15-39                    | At diagnosis        | 74                         | Median 81 or 89 months depending on treatment | The seven-year overall and leukemia-specific survival for cord blood transplant patients were 55% and 48%, respectively, compared to sibling-allo-HCT which was 63% and 61%, respectively.                                                                                                                                                                                                             | None presented                                                                                                           | NA                                                  |



| Reference                           | Country of origin   | Purpose                                                                                                                                                                                                                                                                        | Data source                | Cancer type                  | Diagnosis period | Age at diagnosis (years) | Survival entry date | Number of AYA participants | Follow-up time                                    | Results                                                                                                                                                                                                                                                                                                                              | Statistically significant risk factors                                                  | Non-significant risk factors |
|-------------------------------------|---------------------|--------------------------------------------------------------------------------------------------------------------------------------------------------------------------------------------------------------------------------------------------------------------------------|----------------------------|------------------------------|------------------|--------------------------|---------------------|----------------------------|---------------------------------------------------|--------------------------------------------------------------------------------------------------------------------------------------------------------------------------------------------------------------------------------------------------------------------------------------------------------------------------------------|-----------------------------------------------------------------------------------------|------------------------------|
| hematopoietic cell transplantation. |                     |                                                                                                                                                                                                                                                                                |                            |                              |                  |                          |                     |                            |                                                   |                                                                                                                                                                                                                                                                                                                                      |                                                                                         |                              |
| Baron F, 2020 [95]                  | 80 European centers | To evaluate the long-term impact of type of anthracycline given in the induction chemotherapy. Also, to evaluate the impact of hematopoietic stem cell transplantation(HL A identical sibling donor or an autologous) for patients who reach complete or incomplete remission. | EORTC/GI MEMA AML-10 trial | Primary or secondary AML     | 1993-1999        | 15-35                    | At diagnosis        | 661                        | Median 11 years                                   | No difference in survival by randomization group type (MXR/IDA vs DNR) for AYA 15-25 (HR: 0.85, 95%CI: 0.56-1.27) or AYA 26-35 (HR: 1.11, 95%CI: 0.78-1.58). Similarly, no difference in survival was found by donor type (i.e., no donor vs donor) for AYA 15-25 (HR: 0.66, 95%CI: 0.4-1.1) or 26-35 (HR: 0.65, 95%CI: 0.4-1.03) or | None presented                                                                          | NA                           |
| Venkitachalam R, 2020 [96]          | United States       | To examine temporal trends in overall survival and early mortality among pediatric acute promyelocytic leukemia.                                                                                                                                                               | SEER                       | Acute Promyelocytic Leukemia | 1976-2016        | 16-20                    | At diagnosis        | 246                        | NR: Overall survival truncated at 7 years         | The seven year survival probability was approximately 75.6% among AYA 16-20                                                                                                                                                                                                                                                          | None presented                                                                          | NA                           |
| Melanoma cohort                     |                     |                                                                                                                                                                                                                                                                                |                            |                              |                  |                          |                     |                            |                                                   |                                                                                                                                                                                                                                                                                                                                      |                                                                                         |                              |
| Fossa S, 2011 [97]                  | United States       | To identify factors that increase risk of testicular cancer-specific mortality.                                                                                                                                                                                                | SEER                       | Testicular cancer            | 1978-2006        | 15-39                    | At diagnosis        | 20,411                     | 97,127 person-years for 15-29 and 93849 for 30-39 | Ten-year cumulative TC-specific mortality rate for seminoma and nonseminoma were 1.4% (95%CI 1.2% to 1.7%) and 6.1% (95%CI 5.7% to 6.7%), respectively. Significantly decreased in mortality was observed for participants aged 40 at diagnosis for seminoma HR:                                                                     | Non-seminoma patients higher 10 year-cumulative mortality reported than in the seminoma | None stratified by age       |

| Reference            | Country of origin | Purpose                                                                                                               | Data source                    | Cancer type                         | Diagnosis period | Age at diagnosis (years) | Survival entry date | Number of AYA participants | Follow-up time                                                                                                  | Results                                                                                                                                                                                                    | Statistically significant risk factors                                                                                                                    | Non-significant risk factors |
|----------------------|-------------------|-----------------------------------------------------------------------------------------------------------------------|--------------------------------|-------------------------------------|------------------|--------------------------|---------------------|----------------------------|-----------------------------------------------------------------------------------------------------------------|------------------------------------------------------------------------------------------------------------------------------------------------------------------------------------------------------------|-----------------------------------------------------------------------------------------------------------------------------------------------------------|------------------------------|
|                      |                   |                                                                                                                       |                                |                                     |                  |                          |                     |                            |                                                                                                                 | 2.0 (95%CI 1.5 to 2.6); and nonseninoma HR: 2.1 (95% CI, 1.7 to 2.6)                                                                                                                                       | group. No statistical test done for this. However we can see that the CI do not overlap between the two groups                                            |                              |
| Pollack L, 2011 [98] | United States     | To describe melanoma survival in the United States by demographics and cancer characteristics.                        | SEER                           | Melanoma excluding melanoma in situ | 1992-2005        | 15-39                    | At diagnosis        | 13,383                     | NR: Based on exclusion criteria, minimum follow-up time is 5 years                                              | 10-year Melanoma-specific survival was 91.9%. AYA had better 10-year survival probability than those diagnosed at 40-64 (86.7%) or 65+(77.0%).                                                             | None presented                                                                                                                                            | NA                           |
| Green A, 2012 [99]   | Australia         | To determine 20-year survival among people diagnosed with thin melanomas (<= 1.00 mm) in the general population.      | Queensland Cancer Registry     | Thin melanomas (<= 1.00 mm)         | 1982-2006        | 15-24                    | At diagnosis        | 1,381                      | NR                                                                                                              | Ten, 15 and 20-year thin melanoma survival probabilities were 98.5%, 98.2% and 97.9% respectively. Better overall survival from thin melanomas for 15-24 years compared to those 45 or older at diagnosis. | None presented                                                                                                                                            | NA                           |
| Reed K, 2012 [100]   | United States     | To determine the incidence of melanoma and overall disease-specific survival of young adults with cutaneous melanoma. | Rochester Epidemiology Project | Cutaneous melanoma                  | 1970-2009        | 18-39                    | At diagnosis        | 256                        | Median 3.1 years for participants who died; Median 4.4 years for participants who were alive at last follow-up. | Ten-year overall survival probability by decade of diagnosis were approximately 82.7% for 1970-1979, 89.1% for 1980-1989, 94.3% for 1990-199, and 99.7% for 2000-2009.                                     | Period of diagnosis (worst in earlier periods 1970-1979. Significant decrease in risk of death with each 1-year increased in calendar year of diagnosis ) | Sex and histologic subtype   |

| Reference                   | Country of origin | Purpose                                                                                                                                | Data source                                                                                                         | Cancer type                   | Diagnosis period | Age at diagnosis (years) | Survival entry date | Number of AYA participants | Follow-up time                                          | Results                                                                                                                                                                                                                                                                                                                                                     | Statistically significant risk factors                                                                                                                                                                                       | Non-significant risk factors                                                                                                         |
|-----------------------------|-------------------|----------------------------------------------------------------------------------------------------------------------------------------|---------------------------------------------------------------------------------------------------------------------|-------------------------------|------------------|--------------------------|---------------------|----------------------------|---------------------------------------------------------|-------------------------------------------------------------------------------------------------------------------------------------------------------------------------------------------------------------------------------------------------------------------------------------------------------------------------------------------------------------|------------------------------------------------------------------------------------------------------------------------------------------------------------------------------------------------------------------------------|--------------------------------------------------------------------------------------------------------------------------------------|
| Gamba C, 2013 [101]         | United States     | To determine whether long-term survival varies between non-Hispanic White male and female AYA diagnosed with melanoma.                 | SEER                                                                                                                | Invasive melanoma of the skin | 1989-1999        | 15-39                    | At diagnosis        | 8,853                      | Mean follow-up 13.1 years for cases diagnosed 1989-1999 | The results reported are for participants in the 1989-1999 diagnosis period. Overall, males are at high risk of mortality compared to females (HR: 1.45, 95% CI 1.25-1.67). Stratifying by age at diagnosis, the significantly increased risk in males was observed for males aged 30-34 (HR: 1.92, 95%CI 1.45-2.54) and 35-39 (HR: 1.28, 95%CI 1.03-1.60). | All comparisons made are for males vs. females: Male sex, age 30+ , histologic subtype (SSM, NM, NOS), tumor thickness (all significant except for $\geq 4.01$ ), Presence of metastasis (cutaneous only, regional, unknown) | All comparisons are made for males vs females: Age at diagnosis (15-124, 25-29 ); tumor thickness( $\geq 4.01$ ); Distant metastasis |
| Plym A, 2014 [102]          | Sweden            | To compare clinical characteristics, management and survival between young adults and older adult melanoma patients in Central Sweden. | Regional Quality Register of Cutaneous Malignant Melanoma in Central Sweden (the Uppsala/Örebro Health Care Region) | Invasive malignant melanoma   | 1997-2011        | 15-39                    | At diagnosis        | 584                        | Median 4.9 years                                        | Eight and 10-year cumulative relative survival were approximately 92.1% and 90.9% respectively                                                                                                                                                                                                                                                              | Stage of disease (Stage III worst)                                                                                                                                                                                           | No                                                                                                                                   |
| Other tumor-specific cohort |                   |                                                                                                                                        |                                                                                                                     |                               |                  |                          |                     |                            |                                                         |                                                                                                                                                                                                                                                                                                                                                             |                                                                                                                                                                                                                              |                                                                                                                                      |
| Smoll N, 2013 [103]         | United States     | To model the differences in survival of                                                                                                | SEER                                                                                                                | Chordoma                      | 1973-2009        | 16-39                    | At diagnosis        | 205                        | Median 4.7 years                                        | Relative survival rates for AYAs were 69% (95% CI 60-76) , 59% (95% presented                                                                                                                                                                                                                                                                               | None presented                                                                                                                                                                                                               | NA                                                                                                                                   |

| Reference          | Country of origin | Purpose                                                                                                                                                                    | Data source | Cancer type                  | Diagnosis period | Age at diagnosis (years) | Survival entry date | Number of AYA participants | Follow-up time       | Results                                                                                                                                                                                                                                                                                                                                                                                                                                                                                                                                                                                                                                                                                                                                                                                                                                                                                                                  | Statistically significant risk factors                                                                                                                                     | Non-significant risk factors                                                                                                                                                                                                                                                                                                                                       |
|--------------------|-------------------|----------------------------------------------------------------------------------------------------------------------------------------------------------------------------|-------------|------------------------------|------------------|--------------------------|---------------------|----------------------------|----------------------|--------------------------------------------------------------------------------------------------------------------------------------------------------------------------------------------------------------------------------------------------------------------------------------------------------------------------------------------------------------------------------------------------------------------------------------------------------------------------------------------------------------------------------------------------------------------------------------------------------------------------------------------------------------------------------------------------------------------------------------------------------------------------------------------------------------------------------------------------------------------------------------------------------------------------|----------------------------------------------------------------------------------------------------------------------------------------------------------------------------|--------------------------------------------------------------------------------------------------------------------------------------------------------------------------------------------------------------------------------------------------------------------------------------------------------------------------------------------------------------------|
|                    |                   | chordoma patients across age groups in the face of differing expected mortality rates by using relative survival methods to assess the effect of age and sex on prognosis. |             |                              |                  |                          |                     |                            |                      | CI 49-68) and 56% (95% CI 44-66 ) at 10, 15 and 20 years, respectively.                                                                                                                                                                                                                                                                                                                                                                                                                                                                                                                                                                                                                                                                                                                                                                                                                                                  |                                                                                                                                                                            |                                                                                                                                                                                                                                                                                                                                                                    |
| Youn P, 2014 [104] | United States     | To quantify long-term, site-specific mortality risks associated with survival of adolescent bone and soft tissue sarcoma.                                                  | SEER        | Bone and soft tissue sarcoma | 1973-2007        | 15-39                    | At diagnosis        | 28,844                     | 113,206 person-years | All-cause mortality in survivors was 76% higher compared to that of the general population (SMR 1.76, 95% CI 1.60-1.92; AER 19). At 20 years, this trend persisted (SMR 1.39, 95% CI 1.04-1.82; AER 20). Risk of mortality from reasons other than the original diagnosis were larger for patients with chemoresponsive vs. nonchemoresponsive sarcomas (SMR 2.76, 95% CI 2.20-3.41 vs. SMR 1.63, 95% CI 1.47-1.80). Chemotherapy (SMR 3.18, 95% CI 2.29-4.3), radiotherapy (SMR 4.54, 95% CI 1.8-4.67), or chemotherapy and radiotherapy (SMR 1.36, 95% CI 0.68-2.43) were associated with elevated mortality among patients with chemosensitive sarcoma. SMR was similarly elevated in treatment groups containing patients with nonchemosensitive sarcoma. Chemotherapy significantly contributed to excess deaths from second cancers (SMR=5.24, 95% CI 2.61-9.38) and noncancer causes (SMR=2.79, 95% CI 1.9-3.97). | Type of treatment (Significantly higher SMR for Chemo+/- surgery, radiation +/- surgery, and chemo+radiation +/- surgery), histology (Chemosensitive vs Nonchemosensitive) | Type of treatment: Surgery only for all causes of death (i.e., non-sarcoma, second cancer, non-cancer, and circulatory disease death) among chemosensitive sarcoma patients, and for second cancer and circulatory disease death among Nonchemosensitive sarcoma patients. Chemotherapy +/- Surgery for circulatory disease death among nonchemosensitive sarcoma. |

| Reference            | Country of origin | Purpose                                                                                                                                                                                                                                                                    | Data source                | Cancer type                                                        | Diagnosis period | Age at diagnosis (years) | Survival entry date | Number of AYA participants | Follow-up time | Results                                                                                                                                                                                                                                                                                                                                                          | Statistically significant risk factors                                                                                                                                                                            | Non-significant risk factors                                                                                                                                                                                                                                       |
|----------------------|-------------------|----------------------------------------------------------------------------------------------------------------------------------------------------------------------------------------------------------------------------------------------------------------------------|----------------------------|--------------------------------------------------------------------|------------------|--------------------------|---------------------|----------------------------|----------------|------------------------------------------------------------------------------------------------------------------------------------------------------------------------------------------------------------------------------------------------------------------------------------------------------------------------------------------------------------------|-------------------------------------------------------------------------------------------------------------------------------------------------------------------------------------------------------------------|--------------------------------------------------------------------------------------------------------------------------------------------------------------------------------------------------------------------------------------------------------------------|
|                      |                   |                                                                                                                                                                                                                                                                            |                            |                                                                    |                  |                          |                     |                            |                |                                                                                                                                                                                                                                                                                                                                                                  |                                                                                                                                                                                                                   | RT +/- Surgery for non-cancer death among Chemosensitive and circulatory disease death for both chemosensitive and nonchemosensitive sarcoma patients. Chemo and RT +/- Surgery for noncancer, and circulatory disease death among Chemosensitive sarcoma patients |
| Keegan T, 2015 [105] | United States     | To evaluate survival among AYA men and by neighborhood SES, health insurance status, and detailed clinical factors to identify subgroups of young patients at higher risk of mortality from this cancer that is, otherwise, generally associated with excellent prognosis. | California Cancer Registry | First invasive thyroid carcinoma excluding Hürthle cell carcinomas | 1998-2010        | 15-39                    | At diagnosis        | 16,827                     | Mean 10.3      | Compared to women of the same age, AYA men were more likely to die from any cause after a diagnosis of thyroid cancer (HR 2.68, 95% CI 2.14–3.34). Higher risk of death for AYAs diagnosed at 30-34 (HR:1.53, 95% CI 1.16–2.01) and 35-39 (HR: 2.01, 95% CI 1.54–2.62) years of age compared to those diagnosed at 15-29 survival than younger AYAs (HR 1.5-2.0) | Male sex (vs. Female), older age at diagnosis (30-34, 35-39 vs., 15-29), residing in lower SES neighbourhoods (low (quintile 1-2 vs. High (quintile 3-5)), residing in non-metropolitan areas (vs. Metropolitan), | Race/ethnicity (African American, Hispanic, Asian/Pacific vs. Non-Hispanic White); Histology (Follicular vs. Papillary); Lymph node dissection (yes, unknown vs. No); Total thyroidectomy                                                                          |

| Reference             | Country of origin | Purpose                                                                                                                          | Data source | Cancer type       | Diagnosis period | Age at diagnosis (years) | Survival entry date | Number of AYA participants | Follow-up time                                | Results                                                                                                                                                                                                                                                                                                                                                                                                                                                                                                                                                                                                                                 | Statistically significant risk factors                                                                                  | Non-significant risk factors                                                                                                                         |
|-----------------------|-------------------|----------------------------------------------------------------------------------------------------------------------------------|-------------|-------------------|------------------|--------------------------|---------------------|----------------------------|-----------------------------------------------|-----------------------------------------------------------------------------------------------------------------------------------------------------------------------------------------------------------------------------------------------------------------------------------------------------------------------------------------------------------------------------------------------------------------------------------------------------------------------------------------------------------------------------------------------------------------------------------------------------------------------------------------|-------------------------------------------------------------------------------------------------------------------------|------------------------------------------------------------------------------------------------------------------------------------------------------|
| DeRouen M, 2016 [106] | United States     | To study the independent association between race/ethnicity and/or neighborhood SES and survival in AYAs with testicular cancer. | SEER        | Testicular cancer | 1988-2010        | 15-39                    | At diagnosis        | 14,249                     | Average 11.3 years for censored participants. | Higher risk of overall mortality observed for: Black (HR: 1.41, 95%CI 1.01–1.97) and Hispanic AYA (HR: 1.21 95%CI 107–1.37) compared to White; AYA from middle (HR: 1.34, 95% CI 1.12–1.60) and low (HR: 1.79, 95%CI 1.50–2.14) SES neighborhoods compared to those from high SES; Not married compared to married (HR: 1.57, 95% CI 1.39–1.78). Lower risk of mortality observed in AYA diagnosed at 15-24 compared to AYA 25-39 (HR: 0.70, 95%CI 0.61–0.80), and for those in more recent diagnostic eras (1996-2003 and 2004-2010) compared to 1998-1995 (HR: 0.77, 95% CI 0.67-0.88 and HR: 0.75, 95C% CI 0.64-0.87, respectively). | being unmarried (vs. Married), having subsequent cancer (vs. no). Public/no insurance (vs. Private/military insurance). | (yes vs. No); Radioactive Iodine ( yes vs. No); Hormone therapy (yes vs. no) Race/ethnicity (Back, Asian/PI, Hispanic, Other vs. White for seminoma) |

| Reference                       | Country of origin | Purpose                                                                                                                                                                                                                  | Data source                          | Cancer type                                                                    | Diagnosis period | Age at diagnosis (years) | Survival entry date    | Number of AYA participants | Follow-up time                            | Results                                                                                                                                                                                                                                                                                                                                           | Statistically significant risk factors                                                                                                        | Non-significant risk factors                                                                    |
|---------------------------------|-------------------|--------------------------------------------------------------------------------------------------------------------------------------------------------------------------------------------------------------------------|--------------------------------------|--------------------------------------------------------------------------------|------------------|--------------------------|------------------------|----------------------------|-------------------------------------------|---------------------------------------------------------------------------------------------------------------------------------------------------------------------------------------------------------------------------------------------------------------------------------------------------------------------------------------------------|-----------------------------------------------------------------------------------------------------------------------------------------------|-------------------------------------------------------------------------------------------------|
|                                 |                   |                                                                                                                                                                                                                          |                                      |                                                                                |                  |                          |                        |                            |                                           |                                                                                                                                                                                                                                                                                                                                                   | compared to 2004-2010 for seminoma).                                                                                                          |                                                                                                 |
| Lau B, 2016 [107]               | United States     | To investigate whether age at primary malignancy is an independent predictor of overall survival (OS) for AYA patients diagnosed with secondary thyroid cancer who have survived ≥5 years from their primary malignancy. | SEER-9 & SEER-13                     | Thyroid SMN after 5 years post-diagnosis of any primary non-thyroid malignancy | 1973-2010        | 15-39                    | 5-years post-diagnosis | 357                        | NR: Median overall survival was 30+ years | Compared to those diagnosed with a first primary at 0-14 years of age, AYA diagnosed with first primary at age 15-39 had significant lower OS at 10 (AYA: 83.6% vs. Pediatric:96.4%), 20 (56.3% vs. 88.0%) and 30 (50.9% vs.88.0%) years post-diagnosis.                                                                                          | Older age at diagnosis (vs 0-14), Black race (vs White), male gender (vs Female), having more than two tumors, more extensive primary disease | None stratified by age mentioned in the text or tables                                          |
| Novetsky Friedman D, 2017 [108] | United States     | To describe early and late overall mortality, cause-specific mortality, and key adverse health outcomes in a large, single-institutional cohort of patients with Ewing sarcoma.                                          | Memorial Sloan Kettering, USA        | Ewing sarcoma                                                                  | 1974-2012        | 20-39                    | At diagnosis           | 97                         | Median 7.8 years                          | HR for all-cause mortality was 3.0 (95% CI 1.4–6.4) for 20-29 year olds and 4.5 (95% CI, 2.0–10.6) for 30-39 year olds, compared to 0-9 year olds.                                                                                                                                                                                                | older age at diagnosis 20-29, 30-39 (vs 0-9)                                                                                                  | None stratified by age at diagnosis                                                             |
| Bownes L, 2018 [109]            | United States     | To examine if SES impacts survival in AYAs with malignant ovarian germ cell tumors.                                                                                                                                      | The National Cancer Data Base (NCDB) | Malignant ovarian germ cell tumors                                             | 1998-2012        | 15-39                    | At diagnosis           | 3,125                      | NR                                        | Decreased survival was observed for those from a lower income quartile without insurance and with lower education background. The adjusted cumulative survival at 100 months from diagnosis by education measured as percentage with no high school were approximately 97.9%, 95.2% , 96.1%, and 95.6% among those with ≥21%, 13.0 to 20.9%, 7.0- | Level of education (≥21% without high school degree vs. <7% )                                                                                 | Insurance type (Government, Private vs. None), Median income quartile (\$63,000 vs. <\$38,000), |

| Reference                 | Country of origin | Purpose                                                                                | Data source | Cancer type                           | Diagnosis period | Age at diagnosis (years) | Survival entry date | Number of AYA participants | Follow-up time                             | Results                                                                                                                                                                                                                                                                                                                                                                                                                                                                                                                                             | Statistically significant risk factors                                                                                                                                                                                                        | Non-significant risk factors                                                                                                                                                                                                           |
|---------------------------|-------------------|----------------------------------------------------------------------------------------|-------------|---------------------------------------|------------------|--------------------------|---------------------|----------------------------|--------------------------------------------|-----------------------------------------------------------------------------------------------------------------------------------------------------------------------------------------------------------------------------------------------------------------------------------------------------------------------------------------------------------------------------------------------------------------------------------------------------------------------------------------------------------------------------------------------------|-----------------------------------------------------------------------------------------------------------------------------------------------------------------------------------------------------------------------------------------------|----------------------------------------------------------------------------------------------------------------------------------------------------------------------------------------------------------------------------------------|
|                           |                   |                                                                                        |             |                                       |                  |                          |                     |                            |                                            | 12.9% and <7.0% without high school degree, respectively (P=0.017). The adjusted 100-months post diagnosis cumulative survival by median income quartiles 2006-2012 were approximately 97.4%, 95.0% , 97.1%, and 95.3% among those with median income <\$38,000, \$38,00-\$47,999, \$48,000-\$62,999, and \$63,000+, respectively (p=0.022). The adjusted 100-months post-diagnosis cumulative survival by insurance type was approximately 92.7%, 92.7% , and 94.4% among those without, government and private insurance, respectively (p=0.019). |                                                                                                                                                                                                                                               |                                                                                                                                                                                                                                        |
| Challapalli S, 2018 [110] | United States     | To describe nonclinical factors associated with head and neck survivorship among AYAs. | SEER-18     | Head and neck squamous cell carcinoma | 2007-2014        | 15-39                    | At diagnosis        | 1,777                      | NR: Analysis based on 8 years of follow-up | Survival rate after 8 years of follow-up: 73%. Similar survival differences by age at diagnosis. Increased hazard of death from head and neck cancer, specifically, for AYA on Medicaid (adjusted HR = 1.61, 95% CI 1.22–2.12) or uninsured (HR = 1.51, 95% CI 1.03–2.21) compared with those with private insurance; for people who did not receive surgery vs. those who did (HR=1.58, 95% CI 1.17-2.13).                                                                                                                                         | uninsured/Medicaid (vs Private), non-Hispanic other (vs. non-Hispanic White), higher stage of cancer (vs. non-Hispanic Black), type of head and neck cancer (oral cavity was worst-Referent Vs Hypopharynx/larynx, Nasopharynx, Oropharynx ), | Age at diagnosis (15-29, 30-34 and 35-39); Year of diagnosis; Male sex (vs Female); Race/ethnicity (vs non-Hispanic White); Overall race/ethnicity variable not significant; site (vs sinonasal (vs Oral cavity), Radiation No/unknown |



| Reference           | Country of origin | Purpose                                                                                                                 | Data source                    | Cancer type                                                                                                | Diagnosis period | Age at diagnosis (years) | Survival entry date | Number of AYA participants | Follow-up time   | Results                                                                                                                                                                                                                                                                                                                                                                                                                                                                                      | Statistically significant risk factors                                                                                                                                                        | Non-significant risk factors |
|---------------------|-------------------|-------------------------------------------------------------------------------------------------------------------------|--------------------------------|------------------------------------------------------------------------------------------------------------|------------------|--------------------------|---------------------|----------------------------|------------------|----------------------------------------------------------------------------------------------------------------------------------------------------------------------------------------------------------------------------------------------------------------------------------------------------------------------------------------------------------------------------------------------------------------------------------------------------------------------------------------------|-----------------------------------------------------------------------------------------------------------------------------------------------------------------------------------------------|------------------------------|
| Chen I, 2018 [111]  | United States     | To compare AYA and pediatric overall survival in the most common pediatric solid tumors.                                | SEER                           | Extracranial solid tumors: Ewing sarcoma, neuroblastoma, osteosarcoma, rhabdomyosarcoma, and Wilms tumors. | 1973-2010        | 15-39                    | At diagnosis        | 4,128                      | NR               | Ten- and 20-year overall survival for AYA patients were, respectively, 42% and 38% for Ewing sarcoma, 30% and 29% for neuroblastoma, 56% and 53% for osteosarcoma, 41% and 39% for rhabdomyosarcoma, and 59% and 57% for Wilms tumor. Compared to pediatric age group (0-15) AYA are at higher risk of dying from all of the cancers studied except for osteosarcoma                                                                                                                         | did not receive surgery (vs received surgery), tumor type (from survival curve, Neuroblastoma seems to be worst survival than Ewing sarcoma, osteosarcoma, rhabdomyosarcoma, and Wilms tumor) | (vs Received radiation)      |
| Chu Q, 2020 [112]   | United States     | To evaluate factors associated with worse survival among breast cancer survivors based on urban versus rural residency. | Louisiana tumor Registry       | Breast Cancer-women stage I to III                                                                         | 2004-2016        | 18-39                    | At diagnosis        | 1,492                      | Median 74 months | Taken AYA 18-39 years of age as referent category, the overall survival was similar than those 40-49 (HR:1.01, 95%CI:0.87- 1.17) and 50-59 (HR:1.147, 95%CI: 0.99-1.32). However, it those diagnosed at ages 60-69 and 70+ had higher risk of mortality than AYA 18-39 (HR:1.68, 95%CI: 1.46- 1.94) vs HR:3.93, 95%CI: 3.40- 4.53) respectively. For cancer-specific survival, the only difference in risk of survival was found on those diagnosed at age 70 or more compared to AYA 18-39. | None presented                                                                                                                                                                                | NA                           |
| Perisa M, 2020 [69] | United States     | To examine clinical features at presentation, treatment factors, toxicities, and                                        | Nationwide Children's Hospital | Ewing Sarcoma                                                                                              | 1990-2017        | 15-39                    | At diagnosis        | 45                         | Median 98 months | Higher risk of mortality in AYA compared to pediatric patients (HR: 3.10, 95%CI:1.45-6.63). Ten year overall survival was approximately                                                                                                                                                                                                                                                                                                                                                      | None presented                                                                                                                                                                                | NA                           |

| Reference | Country of origin | Purpose                                                                   | Data source    | Cancer type | Diagnosis period | Age at diagnosis (years) | Survival entry date | Number of AYA participants | Follow-up time | Results                                    | Statistically significant risk factors | Non-significant risk factors |
|-----------|-------------------|---------------------------------------------------------------------------|----------------|-------------|------------------|--------------------------|---------------------|----------------------------|----------------|--------------------------------------------|----------------------------------------|------------------------------|
|           |                   | outcomes in Ewing sarcoma AYA survivors compared with pediatric patients. | Columbus, Ohio |             |                  |                          |                     |                            |                | 45% for AYA and 64% for pediatric patients |                                        |                              |

Abbreviations: AER, absolute excess risk; ALL, acute lymphoblastic leukemia; AML, acute myelogenous leukemia; AYA, adolescent and young adult; CI, confidence interval; CNS, central nervous system; CVD, cardiovascular disease; HL, Hodgkin lymphoma; HR, hazard ratio; IRR, incidence rate ratio; NHL, non-Hodgkin lymphoma; NR, not-reported; RR, rate ratio; SES, socioeconomic status; SBDR, standardized bed day ratio; SHR, standardized hospitalization ratio; SIR, standardized incidence ratio; SMN, second malignant neoplasm; SPN, second primary neoplasm; YA, young adult.
